1

2

3

4

5 **Dynamic modeling of *Streptococcus pneumoniae* competence provides**  
6 **regulatory mechanistic insights**

7

8 Mathias Weyder, Marc Prudhomme\*, Mathieu Bergé, Patrice Polard and Gwennaele Fichant\*

9 Laboratoire de Microbiologie et Génétique Moléculaires, Centre de Biologie Intégrative,

10 Université de Toulouse, CNRS, UPS, France

11 \*Co-corresponding authors

12

13

14 Running Title: Modeling of pneumococcal cell competence

15

16

17 Keywords: Bacterial competence, negative and positive feedback loops, dynamic modeling,  
18 ordinary differential equations, transcriptional network.

## 19 **Abstract**

20  
21 In the human pathogen *Streptococcus pneumoniae*, the gene regulatory circuit leading to the  
22 transient state of competence for natural transformation is based on production of an auto-  
23 inducer that activates a positive feedback loop. About one hundred genes are activated in two  
24 successive waves linked by a central alternative sigma factor ComX. This mechanism appears  
25 to be fundamental to the biological fitness of *S. pneumoniae*. We have developed a knowledge-  
26 based model of the competence cycle that describes average cell behavior. It reveals that the  
27 expression rates of the two competence operon, *comAB* and *comCDE*, involved in the positive  
28 feedback loop must be coordinated to elicit spontaneous competence. Simulations revealed the  
29 requirement for an unknown late *com* gene product that shuts off competence by impairing  
30 ComX activity. Further simulations led to the predictions that the membrane protein ComD  
31 bound to CSP reacts directly to pH change of the medium and that blindness to CSP during the  
32 post-competence phase is controlled by late DprA protein. Both predictions were confirmed  
33 experimentally.

34

## 35 **Introduction**

36 In *Streptococcus pneumoniae*, competence or X state, is a transient physiological state  
37 induced by activation of a genetic program in response to specific conditions, such as  
38 environmental stress (Claverys *et al*, 2006). Competence state, at least, allows natural  
39 transformation, fratricide (Claverys *et al*, 2007), biofilm formation (Oggioni *et al*, 2006;  
40 Trappetti *et al*, 2011; Vidal *et al*, 2013) and contributes to virulence efficiency (Zhu *et al*, 2015;  
41 Lin *et al*, 2016). In laboratory exponential cultures, after addition of the synthetic auto-inducer  
42 (the competence-stimulating peptide (CSP) (Håvarstein *et al*, 1995), competence develops  
43 abruptly and nearly simultaneously in virtually all the cells, and then, after about 20 minutes,  
44 declines almost as quickly (Alloing *et al*, 1998). During this short period, the bacteria are able  
45 to lyse neighboring cells of their siblings or close relatives (Claverys *et al*, 2007; Johnsborg &  
46 Håvarstein, 2009) and to transform their genome by taking up exogenous DNA and  
47 incorporating it through RecA-mediated homologous recombination (Martin *et al*, 1995; Chen  
48 & Dubnau, 2004; Johnston *et al*, 2014a). This transformation process is natural to many  
49 bacterial taxa and is thought to be a driver of evolution through promotion of horizontal gene  
50 transfer (Johnston *et al*, 2014b). By facilitating acquisition of new genetic traits, competence  
51 thus enables *S. pneumoniae*, a major human pathogen, to adapt to changing environmental

52 conditions by, for example, promoting antibiotic resistance (Tomasz, 1997) and vaccine  
53 evasion (Croucher *et al.*, 2011; Golubchik *et al.*, 2012).

54 Competence in *S. pneumoniae* results from successive waves transcription of two  
55 groups of *com* genes, termed early and late (Dagkessamanskaia *et al.*, 2004; Peterson *et al.*, 2004)  
56 (Figure 1A). Competence develops in response to the export and accumulation of CSP by the  
57 membrane ComAB transporter after maturation of the pre-CSP encoded by *comC* (Claverys *et*  
58 *al.*, 2006). At a critical concentration, CSP activates the two-component signal transduction  
59 system ComDE (Pestova *et al.*, 1996). The membrane-bound histidine kinase ComD associated  
60 with CSP transmits the signal to its cognate response regulator ComE by a phosphorelay  
61 (Martin *et al.*, 2013). ComE~P directly activates the early *com* genes by binding to direct repeats  
62 (ComE-box) in the promoters of their operons (Martin *et al.*, 2013; Boudes *et al.*, 2014). These  
63 include the *comAB* and *comCDE* operons, creating a positive feedback loop which amplifies  
64 the signal and allows competence propagation throughout the population. Included in the early  
65 genes activated by ComE~P is the central competence regulator gene *comX* which encodes  
66 ComX, the competence-specific  $\sigma$  factor ( $\sigma^X$ ) (Lee & Morrison, 1999). ComX enables RNA  
67 polymerase to recognize a specific 8 bp sequence (combox or Cinbox) that characterizes the  
68 promoters of late *com* genes (Claverys & Havarstein, 2002; Peterson *et al.*, 2000). Another early  
69 gene, *comW*, (Luo *et al.*, 2004) is involved in stabilization of ComX through prevention of ClpP-  
70 dependent proteolysis (Piotrowski *et al.*, 2009), as well as in ComX-mediated activation (Sung  
71 & Morrison, 2005), possibly through enhancement of ComX's binding to core RNA polymerase  
72 (Tovpeko & Morrison, 2014; Tovpeko *et al.*, 2016). However, the mechanisms by which ComW  
73 acts are still unclear. Genes under direct ComX control include those coding for the DNA  
74 uptake machinery and proteins dedicated to the processing of transforming DNA (Johnston *et*  
75 *al.*, 2014b), such as DprA, as well as genes implicated in fratricide (Claverys *et al.*, 2007). Shut-  
76 off of pneumococcal competence depends on two known mechanisms: i) the balance between  
77 ComE~P, which activates early competence genes, and ComE, which antagonizes their  
78 expression by competing for binding to the ComE-box (Martin *et al.*, 2013), and ii) the  
79 repression of the positive feedback loop by DprA, which forms a complex with ComE~P that  
80 blocks the latter's action through either sequestration or dephosphorylation (Mirouze *et al.*,  
81 2013; Weng *et al.*, 2013).

82 The circuits that regulate competence for transformation are adapted to the lifestyle of  
83 each species, as exemplified by *S. pneumoniae* and *B. subtilis* (Johnston *et al.*, 2014b; Claverys  
84 *et al.*, 2006). Two distinct regulatory circuits have been reported to control the expression of  
85 ComX within the Streptococci. Phylogenetic analyses have shown that one, based on the

86 *comCDE* system, is present in species of the mitis and anginosus groups (Martin *et al*, 2006)  
87 while the other, based on the recently-discovered *comRS* transcriptional activation system  
88 (Gardan *et al*, 2009; Fontaine *et al*, 2010), is found in species of the mutans, salivarius, bovis,  
89 pyogenic and suis groups (Johnston *et al*, 2014b; Fontaine *et al*, 2015).

90 Several mathematical models have been developed to aid the study of competence  
91 regulation in *B. subtilis* (Maamar & Dubnau, 2005; Süel *et al*, 2006; Maamar *et al*, 2007;  
92 Schultz *et al*, 2007; Leisner *et al*, 2009; Schultz *et al*, 2009, 2013). Two models have also been  
93 published to help answer some of outstanding questions concerning the ComRS regulatory  
94 cascades of *S. mutans* (Son *et al*, 2012) and *S. thermophiles* (Haustenne *et al*, 2015). Both  
95 models were established to investigate components of the ComRS system critical for ComX  
96 production. However, despite our extensive knowledge of ComCDE regulation circuit in  
97 *S.pneumoniae*, only two attempts to model this regulatory circuit have been published. Karlsson  
98 and collaborators focused on a possible mechanism for abrupt competence shut-off, since the  
99 mechanisms involved had not yet been unraveled (Karlsson *et al*, 2007). Their model suggested  
100 that a putative *comX*-dependent repressor that inhibits expression of *comCDE* and *comX*, is  
101 responsible for competence shut-down. However, subsequent work argued against this  
102 proposal, by showing that the late competence protein DprA is involved in competence shut-  
103 off through dephosphorylation or sequestration of ComE~P (Mirouze *et al*, 2013) rather than  
104 through direct interference with *comCDE* and *comX* expression. More recently, Moreno-Gómez  
105 and collaborators (Moreno-Gómez *et al*, 2017) published a model of spontaneous competence  
106 development in *S. pneumoniae* that takes account of environmental conditions and cell history.  
107 Both models describe competence development for a homogeneous population, based on the  
108 assumption that initiation of competence is controlled by a quorum sensing system in which  
109 cell density must rise high enough for the population to detect the CSP auto-inducer threshold  
110 and switch en masse to the competent state.

111 However, other observations challenge the view that CSP accumulation in the growth  
112 medium is directly proportional to the cell density. Experiments have shown that various  
113 environmental parameters control the timing of spontaneous competence induction in cell  
114 populations, disqualifying cell density as the crucial parameter (Claverys *et al*, 2006). Recent  
115 results (Prudhomme *et al*, 2016) show that the spontaneous competence shift in a non-  
116 competent population relies on a self-activated cell sub-population that arises *via* a growth time-  
117 dependent mechanism. During this short period of competence development, since CSP is  
118 mostly retained on the cell surface, competence propagates by successive contacts between  
119 activated and non-competent receiver cells. These results call into question the assumption of

120 population homogeneity that underlies the former mathematical models of competence  
121 regulation in *S. pneumoniae*. Indeed, designing a dynamic model at the population scale  
122 requires one to take into account non-homogeneity of the population and interaction between  
123 individual cells. We have now modelled this regulatory circuit, first at the cell level to provide  
124 a module that can then be embedded in more complex models to study competence propagation  
125 within the whole cell population where both hypotheses - quorum sensing or self-activated sub-  
126 population - can be tested.

127 We have taken a two-step approach. We first integrated the available information into a  
128 Petri net framework and performed structural analysis of the model. We then explored the  
129 dynamics of the model in a deterministic framework, using ordinary differential equations  
130 (ODEs). We have exploited previously published real time measurements of gene activities  
131 obtained from *in vivo* transcriptional data (Mirouze *et al*, 2013), which we have transformed  
132 into average promoter activities and average protein synthesis rates per cell by applying recently  
133 published mathematical approaches (de Jong *et al*, 2010; Stefan *et al*, 2015). The first designed  
134 knowledge-based model corroborates previous experimental findings but also reveals gaps in  
135 our knowledge of competence shut-off. We have addressed these gaps by testing eight  
136 alternative models for competence shut-off. Our results suggest that competence shut-off  
137 involves an interaction between ComW and the product of a late *com* gene which impairs ComX  
138 activity. Furthermore, *in silico* perturbations of key network parameters revealed the  
139 mechanism of two hallmarks of pneumococcal competence regulation: i) modulation of  
140 competence induction level by pH variation in the growth medium appears to be directly linked  
141 to CSP interaction with ComD; ii) cells exiting competence could not immediately re-start a  
142 competence cycle, a ‘blind-to-CSP’ period found to be controlled by DprA. Both were  
143 supported experimentally. Moreover, using the model to simulate spontaneous competence  
144 induction, we highlight the need for coordinated basal expression of *comAB* and *comCDE* to  
145 govern the ComE~P-ComE ratio that is crucial to initiating the positive feedback loop.

146

147

## 148 **Results**

### 149 **Modeling assumptions and reaction network description**

150 We focused our efforts on creating a model whose simulated behaviors are consistent with the  
151 available experimental results. Below, we give more details on the available knowledge  
152 concerning some important parts of the regulatory network, in order to explain our modeling

153 choices and the assumptions we made to simplify our model. The reactions are summarized in  
154 Table 1 and depicted in Figure 1A. We addressed the dynamic modeling of the *S. pneumoniae*  
155 competence cycle at the cell level, where competence is induced in laboratory conditions by  
156 addition of saturating concentrations of exogenous synthetic CSP to non-competent cells  
157 growing in liquid culture. Induction in this manner triggers competence synchronously  
158 throughout the population. Hence, quantitative measurements of reporter gene expression can  
159 be used to estimate the average cell behavior (de Jong *et al*, 2010; Stefan *et al*, 2015).

160

### 161 *Assumptions*

162 To simplify analysis and computational handling, we treated transcription and translation as a  
163 single step, and designed our network at the protein level. This simplification is based on the  
164 assumption that the mRNA concentrations are in quasi-steady state, in the sense that they adapt  
165 almost instantaneously to changes in promoter activity. Thus, it is possible to overlook the  
166 variations of mRNA concentration and to write variations of the protein concentration directly  
167 as a function of the promoter activity. This is known as the quasi-steady-state approximation.  
168 Indeed, when slow processes dominate, the fast processes are assumed to be continuously in  
169 quasi-equilibrium (Chen *et al*, 2010).

170 Further assumptions were made to reduce the number of actors in the network : i) CSP  
171 degradation by the cell wall protease HtrA (Cassone *et al*, 2012) was not explicitly modeled but  
172 was included in the CSP degradation constant; ii) ATP and ADP cofactors for phosphorylation  
173 reactions were not explicitly included in the network, since ATP concentration is presumably  
174 not a limiting factor during exponential growth; iii) among the late *com* gene products, *i.e.*  
175 products of genes under control of ComX, we took into account only DprA, whose action in  
176 competence shut-off has been described (Mirouze *et al*, 2013), and SsbB, which is commonly  
177 used in experimental assays as a reporter of late gene expression; iv) ComX, being a sigma  
178 factor, regulates its target genes by forming a complex with RNA polymerase, but since only  
179 *comX* expression is regulated by the competence network we have not explicitly included the  
180 RNA polymerase component; v) DprA-ComE binding was ignored, since there are no  
181 quantitative data on DprA-ComE~P protein-protein interactions, other than that DprA has much  
182 higher affinity for ComE~P than for ComE (Mirouze *et al*, 2013).

183

184 *Initiation of the competence state: the ComDE two-component system*

185 Once CSP reaches a critical external concentration, it activates the two-component signal-  
186 transduction system (TCS) ComDE, which belongs to the AgrA/AlgR/LytR family (Lange *et*  
187 *al*, 1999). Since the ComDE mechanism is not completely understood, we took advantage of  
188 the experimental results obtained from detailed studies performed in *Staphylococcus aureus* on  
189 the AgrCA TCS (George Cisar *et al*, 2009). The AgrC histidine kinase forms a dimer before  
190 autophosphorylation. This dimer possesses a basal autophosphorylation activity independent of  
191 ligand binding, as also observed for ComD (Martin *et al*, 2010). The AgrC dimer possesses two  
192 independent ligand binding sites with no evidence of cooperativity (Wang *et al*, 2014). By  
193 analogy, we have modelled ComD phosphorylation in the same manner: formation of a dimer  
194 of ComD (Table 1, reaction 2 and reverse reaction 3) whose autophosphorylation can be either  
195 independent of CSP binding (Table 1, Reaction 4) or activated by CSP interaction (Table 1,  
196 reaction 5).

197 Despite several attempts, transphosphorylation of ComE *in vivo* to the active form that induces  
198 early genes was not detected (Martin *et al*, 2013). However, the phosphorylmimetic mutant  
199 ComE<sup>D58E</sup> protein dimerizes in solution whereas ComE has been observed only in its  
200 monomeric form (Martin *et al*, 2013). Moreover, structural data on the complex  
201 ComD/ComE/*comCDE* indicates that the transfer of the phosphoryl group from the histidine  
202 kinase to its cognate response regulator ComE mediates ComE dimerization through the  
203 binding of a phosphorylated ComD dimer to two monomers of ComE (Sanchez *et al*, 2015).  
204 Hence, we simplify the reaction by assuming that a dimer of ComD~P transphosphorylates a  
205 dimer of ComE (Table 1, reaction 6). After transphosphorylation, the CSP-bound ComD dimer  
206 ((ComD-CSP)<sub>D</sub>) can either enter a cycle of phosphorylation-transphosphorylation and activate  
207 many molecules of ComE or become inactive. The fact that the number of ComD molecules  
208 increases from 1500 per cell before competence induction to 39000 per competent cell (Martin  
209 *et al*, 2013) and the recent demonstration that ComD is involved in CSP retention (Prudhomme  
210 *et al*, 2016) tend to favor the second hypothesis. Therefore, we assume that once an active CSP-  
211 bound dimer of ComD has phosphorylated a dimer of ComE, it becomes inactive. We simply  
212 model the fate of the inactive form of the CSP-bound dimer of ComD by degradation (Table 1,  
213 reaction (12)).

214 The dephosphorylation of ComE~P has not yet been documented. No phosphatase active on the  
215 histidine kinase ComD has been reported, nor has any other protein that might fulfill this

216 function. Moreover, no detectable phosphatase activity of the homologous *S. aureus* AgrC  
217 histine kinase on its cognate response regulator AgrA was detected, and it was concluded that  
218 the decrease in AgrA phosphorylation level was due to its self-catalyzed dephosphorylation  
219 (Wang *et al*, 2014). Consequently, in our model, we hypothesize that ComE~P will also  
220 catalyze its own dephosphorylation (Table 1, reaction 7).

221 Since the degradation rates of (ComD~P-CSP)<sub>D</sub>, also called ComD<sub>act</sub> in Table 1, and of  
222 (ComE~P)<sub>D</sub> are very slow compared to their phosphorylation lability (see below in “parameter  
223 estimation”), we did not include reactions that degrade their phosphorylated forms. We  
224 considered that these forms are consumed by the transphosphorylation and the  
225 dephosphorylation reactions, respectively (Table 1, reactions 6 and 7).

### 226 *The central regulator ComX*

227 The sigma factor ComX, responsible for activating expression of late *com* genes, required  
228 ComW both for protection from degradation by ClpE-ClpP protease (Piotrowski *et al*, 2009)  
229 and for its activation (Sung & Morrison, 2005). It was first suggested that competence and late  
230 gene transcription might terminate due simply to the disappearance of ComX. However, more  
231 recent observations, showing that *clpP* mutant cells, in which ComX and ComW are stable,  
232 escape from the competent state as rapidly as wild-type, suggested that another mechanism is  
233 responsible for terminating late gene transcription (Piotrowski *et al*, 2009). To integrate this  
234 knowledge into our model, we uncouple the two roles of ComW. ComX stabilization has been  
235 included in the half-life parameter of ComX to avoid incorporating ClpE-ClpP protease in our  
236 model. Activation of ComX by ComW has been taken into account by creating two forms of  
237 ComX, inactive and active. ComX is first synthesized as an inactive form that becomes active  
238 under the action of ComW (Table 1, reactions 8 and 9).

239

### 240 *Competence shut-off*

241 It has been recently suggested that the shut-off of the *comCDE* promoter ( $P_{comC}$ ) is intrinsic to  
242 ComDE, as the decrease of *comCDE* transcription occurs in the absence of any late *com* gene  
243 product (Martin *et al*, 2013; Mirouze *et al*, 2013). Based on the observation that  
244 nonphosphorylated ComE efficiently binds  $P_{comC}$  *in vitro* and that its overexpression  
245 antagonizes spontaneous competence, it has been proposed that ComE accumulating in  
246 response to CSP efficiently outcompetes ComE~P for binding to  $P_{comC}$ , thus preventing further  
247 transcription (Martin *et al*, 2013). However, almost no antagonization of the *comX* gene



248 promoter ( $P_{\text{comX}}$ ) by non-phosphorylated ComE was observed, and lower affinity of ComE for  
249 this promoter (Martin *et al*, 2013) suggests that ComE does not inhibit  $P_{\text{comX}}$  efficiently. In fact,  
250 shut-off of  $P_{\text{comX}}$  requires the action of DprA, a late gene product (Mirouze *et al*, 2013; Weng  
251 *et al*, 2013). Yeast two-hybrid assays have identified a strong interaction between DprA and  
252 ComE~P, suggesting a genuine physical interaction, and a weaker interaction with ComE  
253 (Mirouze *et al*, 2013; Weng *et al*, 2013). It has also been shown that dimerization of DprA is  
254 required for the early *com* gene transcription shut-off. Thus, the action of DprA would be to  
255 shift the ComE/ComE~P ratio in favor of early *com* gene promoter repression. The mechanism  
256 by which DprA acts on this ratio is not yet known, and two hypotheses have been proposed:  
257 DprA forms a complex with ComE~P that blocks ComE~P action through ComE~P  
258 sequestration; alternatively, DprA promotes ComE~P dephosphorylation. We chose to  
259 implement the sequestration scenario in our network since DprA-ComE interaction has been  
260 shown but there is no evidence that the interaction leads to dephosphorylation ((Table 1,  
261 reaction 11). As DprA and ComE share similarly long half-lives (Martin *et al*, 2013; Mirouze  
262 *et al*, 2013), we considered that the fate of the complex is degradation of both proteins (Table  
263 1, reaction 12).

264

## 265 **Mathematical modeling of the competence regulatory network**

266 We first developed a qualitative cell-based model using a Petri net formalism to check the  
267 structural consistency of our model by taking advantage of its mathematical formalism.  
268 Moreover, a Petri net approach, by providing a simple and easily understood qualitative  
269 graphical representation of the network structure, facilitates exchanges during the process of  
270 network design between biologists and modelers. The dynamic behavior of the network was  
271 further studied by turning the network into a set of ordinary differential equations (ODEs).

### 272 *Petri net modeling*

273 In the Petri net (Figure 1B), the molecular species involved in the reactions of Table 1 constitute  
274 places and the reactions have been turned into transitions. For most of the reactions, translation  
275 into places and transitions is self-explanatory, and the network structure will not be described  
276 in detail. The correspondences between reactions and transitions can be found in Table 1. To  
277 model the activation and inhibition of the *comCDE* operon, we introduced three additional  
278 places corresponding to the free ( $P_{\text{comC}_f}$ ), active ( $P_{\text{comC}_{act}}$ ) and inactive ( $P_{\text{comC}_{ina}}$ )

279 forms of the *comCDE* operon promoter. Binding of  $(\text{ComE}\sim\text{P})_{\text{D}}$  switches the promoter to its  
280 active form (transition *association\_PcomC\_ComEP*). This active form allows the synthesis of  
281 pre-CSP, ComD and ComE (transitions *preCSP\_synth*, *ComD\_synth* and *ComE\_synth*  
282 respectively). The same scheme was repeated for the activation and inhibition of *comAB*  
283 synthesis through the introduction of the same three forms of the *comAB* promoter. During  
284 competence shut-off, the competition between ComE and  $(\text{ComE}\sim\text{P})_{\text{D}}$  for binding to  $P_{\text{comC}}$  and  
285  $P_{\text{comAB}}$  will first cause the dissociation of  $(\text{ComE}\sim\text{P})_{\text{D}}$ , that will switch the active promoter to its  
286 free form (transitions *dissociation\_PcomC\_ComEP*, *dissociation\_PcomC\_ComAB*), followed  
287 by binding of ComE leading to the promoter inactivation (*PcomC\_ina*, *PcomAB\_ina*) and  
288 consequently to inhibition of gene expression (transitions *association\_PcomC\_ComE*,  
289 *association\_PcomAB\_ComE*). As ComE and  $(\text{ComE}\sim\text{P})_{\text{D}}$  are competed, the reverse transitions  
290 were also modeled: starting from an inactive form of  $P_{\text{comC}}$  ( $P_{\text{comAB}}$ ), the dissociation of ComE  
291 results in a free promoter able to bind  $(\text{ComE}\sim\text{P})_{\text{D}}$  (transitions *dissociation\_PcomC\_ComE* and  
292 *association\_PcomC\_ComEP*; *dissociation\_PcomAB\_ComE* and  
293 *association\_PcomAB\_ComEP*). For the regulation of *comX* and *comW* expression, as we  
294 assume no direct inhibitory effect of ComE, we simplify the model by omitting the promoter.  
295 Thus,  $(\text{ComE}\sim\text{P})_{\text{D}}$  directly activates the synthesis of ComX and ComW.

#### 296 *Qualitative Petri net model validation*

297 Since we will study the dynamics of this network by using ODEs, we simply perform a  
298 qualitative validation of our models that depends only on the graph structure and does not  
299 require an initial marking. We used the software Charlie (Heiner *et al*, 2015) to compute the  
300 structural invariants (T- and P- invariants) that prove the structural consistency of the model.  
301 We obtained a set of 19 minimal T-invariants among which eight are non-trivial (Appendix  
302 Figure S1). All described T-invariants are biologically meaningful. As every transition of our  
303 network participates in a T-invariant, the model is covered by T-invariants. Thus, every reaction  
304 in the system may occur as part of the basic behavior of the Petri net (Koch & Heiner, 2008).  
305 This is an important property, as the competence state is a transient physiological process. Thus  
306 our model allows a cell in its original growth phase to enter transiently into competence and to  
307 return to its original state of growth.

308 A P-invariant corresponds to a set of places assuring mass conservation and avoiding an infinite  
309 increase of molecules in the model. Only two invariants are detected in the model that  
310 correspond to the different forms (free, inactive or active) of the two promoters  $P_{\text{comC}}$  and

311  $P_{ComAB}$ . This result was expected since proteins required to set up this specific physiological  
312 state need to be synthesized when the cell enters into competence and further degraded when  
313 the system has been shut-off to allow the cell to come back to its original growth phase state.  
314 As the synthesis transition of each component has been associated with its cognate degradation  
315 transition, there is no risk of an infinite accumulation of a given molecule.

316 The structural consistency of our model being proven, the network was converted into a set of  
317 ODEs.

### 318 *Quantitative dynamic modeling*

319 Each place of the Petri net model representing a molecular species will correspond to a state  
320 variable  $x_i(t)$ . For a given state variable, all the transition arcs pointing towards the place will  
321 contribute to the "gain" rate and all the transition arcs pointing away from the place will  
322 contribute to the "loss" rate. The kinetics of the 15 molecular entities of our network,  
323 corresponding to the 15 places of the Petri net, were expressed as the 15 differential equations  
324 reported in Table 2.

325 The ODE approach provides detailed information on the network component dynamics, but  
326 requires high-quality data on component kinetics for estimating the parameters. However, in  
327 practice, quantitative measurements are often partial and available only for a fraction of the  
328 system's entities. Therefore, some of the parameters of continuous models are usually based on  
329 inference. Here, the kinetic parameters of the regulatory network were assigned based on  
330 previous published experimental clues and on promoter activity measurements.

### 331 *Estimations of protein synthesis rates and protein concentration kinetics*

332 We exploited the data produced by Mirouze and collaborators, where transcriptional fusions of  
333 a luciferase reporter gene to the promoters of the target genes (*comC::luc*, *comX::luc*,  
334 *ssbB::luc*) were constructed in a wild type (WT) strain as well as in a *dprA*<sup>-</sup> strain ((Mirouze *et*  
335 *al*, 2013) see Material and Methods therein). Real-time monitoring of gene expression was  
336 conducted when competence was induced by addition of a saturating concentration of  
337 exogenous CSP that allows synchronization of the population response. Luminescence  
338 (expressed in relative luminescence units, RLU) and absorbance (OD<sub>492nm</sub>) values were  
339 recorded every minute after CSP addition over a period of 45 minutes. The quantity of  
340 luminescence per cell as a function of time ( $r(t)$ ) was calculated as the ratio  $r(t) = I(t)/A(t)$ ,  
341 where  $I(t)$  is the luminescence intensity (in RLU) and  $A(t)$  the absorbance values corrected by

342 subtraction of the absorbance background measured on wells containing only growth medium  
343 (de Jong *et al*, 2010). Since the luciferase does not require any post-translational modification  
344 such as folding, this ratio estimates the average concentration of reporter protein per cell. Thus,  
345 the dynamics of the system is conveniently described by the temporal evolution of the luciferase  
346 concentration.

347 The next step was to transform the normalized luminescence signal per cell into promoter  
348 activities and protein kinetics by following the mathematical model developed by Stefan and  
349 collaborators (Stefan *et al*, 2015). To calculate the evolution of the concentration of a given  
350 protein over time, a correction was performed to take into account the differences in half-lives  
351 between the reporter luciferase and the protein whose gene activity is measured. For ComX and  
352 SsbB, which have a shorter life times (estimated at 8 min,  $t_{1/2} = 5.45$  min) than luciferase  
353 (measured at 21.6 min,  $t_{1/2} = 15$  min), the uncorrected values clearly overestimate the protein  
354 concentration (Appendix Figure S2). Conversely, for ComE and ComD whose life-time has  
355 been assessed to be 80 min ( $t_{1/2} = 55.45$  min), the uncorrected values underestimate the protein  
356 concentration (Appendix Figure S2).

357 The kinetics of promoter activities and protein concentration kinetics deduced from the  
358 luminescence data of *comC::luc*, *comX::luc* and *ssbB::luc* in both wild type and *dprA*<sup>-</sup> cells are  
359 shown in Figure 2. For wild type cells, a promoter activity pulse for each studied promoter is  
360 observed following CSP addition in the medium, consistent with the fact that competence is a  
361 transient physiological state. The curve of the calculated protein kinetics presents a shape  
362 similar to that of the promoter activity curve, with a shift owing to the time required to translate  
363 the mRNAs into proteins and a decreasing slope that is consistent with the protein half-lives, *i.*  
364 *e.*, steeper for ComX and SsbB with short half-lives than for ComD and ComE. In *dprA*<sup>-</sup> cells,  
365 coherence between the deduced protein synthesis rates and the different promoter activities is  
366 also observed. The alteration of *comX* transcription shut-off in the *dprA* mutant is clearly  
367 observed as is its incidence on the maintenance of *ssbB* expression. Moreover, our estimates of  
368 protein concentration kinetics obtained in the wild type strain are in agreement with published  
369 experimental results, supporting our choice of protein half-life values for which no precise  
370 measurements are available. For ComD and ComE, the concentration peak is reached about 15  
371 min after CSP addition and the level remains stable over a period of about 25 min, in accordance  
372 with the Western blot results obtained by Martin and collaborators (Martin *et al*, 2013). ComX  
373 appears between five and ten min after CSP addition, reaches a concentration peak after 15 min  
374 and then decays. These kinetics fit the published experimental data (Piotrowski *et al*, 2009; Luo

375 & Morrison, 2003). SsbB kinetics are also consistent with previously published results  
376 (Mirouze *et al*, 2013), with the detection of the protein about 5 min after competence induction,  
377 a maximum concentration around 15-20 min and an almost complete disappearance of protein  
378 after 60 min. Finally, the prolongation of ComX presence in a *dprA*- context as shown by Weng  
379 and collaborators (Weng *et al*, 2013) is reproduced, with the same temporality.

### 380 *Parameter estimation*

381 The parameter values were estimated by exploiting published data where they were available.  
382 Using results from gel-shift experiments indicating that the phosphorylmimetic ComE<sup>D58E</sup> has  
383 a greater affinity than ComE for P<sub>comC</sub> and that P<sub>comC</sub> is a stronger promoter than P<sub>comX</sub> (Martin  
384 *et al*, 2013), we set up constraints on the parameter values with  $K_{comX} > K_{comE} > K_{comE-P}$ . As no  
385 accurate protein life time measurements were available, intervals were determined for  
386 degradation rate constants based on Western blot analyses: [4,12] min<sup>-1</sup> for unstable proteins  
387 ComX and SsbB and [40,120] min<sup>-1</sup> for stable proteins ComE, ComD and DprA (Martin *et al*,  
388 2013; Mirouze *et al*, 2013; Weng *et al*, 2013). We also exploited the experimental results  
389 obtained from the detailed studies on the AgrCA TCS of *S.aureus*. As ComD possesses 50%  
390 similarity with AgrC and ComE 52% with AgrA, we can assume that both TCSs will share  
391 similar biochemical properties. A half-life of 3.9 min has been measured for the phosphorylated  
392 form of the response regulator AgrA, corresponding to an average life time of 5.26 min and to  
393 a self-catalyzed dephosphorylation rate of 0.18 min<sup>-1</sup> (Wang *et al*, 2014). Therefore, the search  
394 space for estimating ComE~P dephosphorylation rate  $\rho$  has been restricted to the interval  
395 [0.1,0.4] min<sup>-1</sup>. The half-life of the phosphorylated form of AgrC (66 seconds) reveals an  
396 efficient phosphoryl group transfer between AgrC~P and AgrA corresponding to a  
397 transphosphorylation rate of 0.63 min<sup>-1</sup> (Wang *et al*, 2014). Thus, the search space for estimating  
398 transphosphorylation constant  $\lambda$  was restrained to [0.4,1] min<sup>-1</sup>.

399 Initial protein concentrations were chosen such that the system is at steady-state at the beginning  
400 of the simulation, corresponding to the non-competence/vegetative state, and such that the  
401 addition of exogenous CSP will initiate competence development.

402 Three datasets were used concomitantly to estimate the parameter values: the two previously  
403 described time-series luminescence signals obtained from WT and *dprA*<sup>-</sup> strains (Mirouze *et al*,  
404 2013) transformed into protein kinetics as previously described, and a third corresponding to  
405 the protein kinetics in a *clpP*<sup>-</sup> strain. In the latter case, no luminescence data were available but  
406 cells have been shown to escape from the competent state as rapidly in a *clpP* mutant as in a

407 wild-type strain (Piotrowski *et al*, 2009). Thus, we generated the *clpP* mutant kinetic data,  
408 where ComX is stable, using the WT dataset and setting the degradation rate constant  $\gamma_{ComX}$  of  
409 ComX to 0 for inferring ComX kinetics.

410 Parameters were estimated using the particle swarm optimization (PSO) method (Eberhart &  
411 Kennedy, 1995), as it had been shown to perform the best (Baker *et al*, 2010). The objective  
412 function that was minimized corresponds to the mean square distance between the calculated  
413 experimental protein concentration kinetics (ComD, ComE, ComX and SsbB) and model  
414 estimated protein concentration kinetics ( $[ComD]_{total}$ ,  $[ComE]_{total}$ ,  $[ComX]_{total}$  and  $[SsbB]$ ). To  
415 generate protein concentration kinetics for the *dprA* mutant, the maximal transcription rate of  
416 *dprA* ( $v_{max_{dprA}}$ ) was set to 0, while for the *clpP* mutant both degradation constants of ComX  
417 ( $\gamma_{comX}$ ) and ComW ( $\gamma_{comW}$ ) were set to 0.

#### 418 *Validation of the ODE model*

419 Comparison of simulated data with the experimental measurements made on the three strains  
420 (WT, *dprA*<sup>-</sup> and *clpP*<sup>-</sup>) reveals a relatively good agreement (Figure 3). However, discrepancies  
421 between the measured and simulated values are observed, especially in the case of SsbB  
422 kinetics. Moreover, in the *clpP* mutant, the steady decrease in SsbB seen 20 min after CSP  
423 addition, a marker of competence shut-off, is not reproduced by our simulation, where the level  
424 of SsbB remains stable over more than 50 min. Therefore, we conclude that another, as yet  
425 unknown, actor is involved in late gene transcription termination, as proposed by Piotrowski  
426 and collaborators (Piotrowski *et al*, 2009) and Weng and collaborators (Weng *et al*, 2013).

#### 427 *Optimization of the initial ODE model*

428 Consequently, we have modified this initial model to integrate a new unknown gene, which  
429 we name *comZ*, whose synthesis could be under the control of either ComE~P (early *com* gene)  
430 or ComX (late *com* gene). We considered four alternative hypotheses for ComZ action  
431 (Appendix Figure S3): i) ComZ interacts with ComW and thus prevents its action in the  
432 transition from the inactive to the active form of ComX, ii) ComZ competes with ComW for  
433 interaction with the inactive form of ComX and affects the formation of the ComX active form,  
434 iii) ComZ inhibits the active form of ComX directly, and iv) ComZ and the active form of  
435 ComX compete for binding to RNA polymerase, in which case ComZ would correspond to the  
436  $\sigma^A$  factor. For each of the eight models, the changes generated in the ODEs are reported in  
437 Appendix Table S1. The parameter estimations and the network simulations were performed as

438 previously. Since the models cannot be compared directly on the basis of their objective  
439 function value, we used the Akaike Information Criterion (AIC). AIC was computed for each  
440 candidate model (Table 3) and the one having the smallest AIC value was selected since it is  
441 considered to be the closest to the unknown reality that produces the data. This corresponds to  
442 the model in which ComZ is a late-gene product that interacts directly with ComW, impairing  
443 the formation of the active form of ComX. Validation of this model is described in more detail  
444 below and is further tested to check its predictive behavior in the specific experimental  
445 conditions used. Comparison of simulated data with the experimental measurements made on  
446 the three strains (WT, *dprA*<sup>-</sup> and *clpP*<sup>-</sup>) for the other models are shown in Appendix Figures S4  
447 to S10. Clearly, direct inhibition of the active form of ComX by ComZ, whether an early or late  
448 *com* gene product, can be ruled out since the simulated values reproduce poorly the  
449 experimental kinetics, especially for SsbB (Appendix Figures S9 and S10). Moreover, for the  
450 same hypothetical action of ComZ, the lowest AIC values are obtained with models based on  
451 the hypothesis that ComZ is a late *com* gene product, and therefore better reproduce the  
452 experimental data (Table 3).

453 *Validation of the new selected model: an unknown late gene product ComZ interacts with*  
454 *ComW and impairs its action*

455 This new model gives good agreement between the simulated and measured kinetics (Figure  
456 4), not only for the wild type strain but also for the *dprA* and *clpP* mutants. Indeed, the value of  
457 0.33 obtained for the objective function value, measuring the sum of squared errors between  
458 measurements and model predictions, is very small. Moreover, despite the stabilization of  
459 ComX in the *clpP* mutant, the kinetics of SsbB reveal that this cell escapes the competent state  
460 as rapidly as the wild type cell.

461 The estimated parameter values (Table 4) appear in accordance with experimental  
462 measurements. Our estimated degradation rate constants lead to a half-life of ComE, ComD  
463 and DprA of 83 min, which have been shown experimentally to be stable over a period of at  
464 least 80 min (Martin *et al.*, 2013; Mirouze *et al.*, 2013; Weng *et al.*, 2013). The estimated half-  
465 lives of ComX and comW at 8 min, and that of SsbB at 6 min are close to their experimental  
466 values of around 5 min (Mirouze *et al.*, 2013; Piotrowski *et al.*, 2009). The estimated value of  
467  $K_{\text{ComE}\sim\text{P}}$  (0.15), the binding constant for ComE~P to  $P_{\text{comC}}$ , shows about a threefold reduction  
468 compared to the estimated value of  $K_{\text{iComE}}$  (0.44), the binding constant for ComE to  $P_{\text{comC}}$ . This  
469 is about the same order of magnitude as the fourfold reduction of the apparent  $K_d$  for  $P_{\text{comC}}$

470 reported for the phosphorylmimetic mutant compared to the  $K_d$  of ComE (Martin *et al*, 2013).  
471 The estimated binding constant ( $K_{ComX}$ ) for ComE~P to  $P_{comX}$  shows an increase of 29-fold  
472 compared to that for  $P_{comC}$ . This is slightly higher than the average tenfold increase reported by  
473 Martin and collaborators (Martin *et al*, 2013). Finally, our estimated half-life of ComE~P is  
474 2.23 min, comparable to 3.9 min measured for the phosphorylated form of AgrA (Wang *et al*,  
475 2014), while the value of the transphorylation rate constant  $\lambda$  has been estimated at  $1 \text{ min}^{-1}$   
476 compared with  $0.63 \text{ min}^{-1}$  for the phosphoryl group transfer constant in the TCS AgrAC (Wang  
477 *et al*, 2014).

#### 478 *Both CSP-ComD interaction and ComD autophosphorylation are pH sensitive*

479 To further challenge our model, we tested the impact of the initial pH of the growth medium on  
480 competence development, since it was reported that this is an important parameter in controlling  
481 competence (Chen & Morrison, 1987). However, this effect has never been studied  
482 experimentally in detail. In the total absence of CSP, basal expression of the master competence  
483 operon *comCDE* depends on an intact ComD-ComE TCS, meaning that ComD basal auto-  
484 phosphorylation and phosphate transfer to ComE occurs (Martin *et al*, 2010). The initial pH of  
485 the growth medium may affect either ComD basal auto-phosphorylation or the kinetics of  
486 autophosphorylation of ComD bound to CSP (CSP-induced phosphorylation). To distinguish  
487 between these options, we recorded *comCDE* promoter activity during the first chain of  
488 induction from CSP to ComE~P in a strain that does not allow export or expression of CSP (see  
489 Material and Methods). The cells were first grown to allow a basal expression of ComDE to  
490 reach the same non-competent physiological state. Samples were then transferred to growth  
491 medium of different initial pH (ranging from 6.8 to 8.19) and different CSP concentrations (0,  
492 25, 50 and  $100 \text{ ng.ml}^{-1}$ ). RLU was directly recorded using the luciferase gene under control of  
493 either the *comCDE* promoter (strain R1205) or the  $tRNA^{arg}$  gene promoter located just upstream  
494 of the *comCDE* operon but not part of the competence regulon (strain R1694) (Martin *et al*,  
495 2010).

496 In the absence of CSP, the increase of the luminescence values over a period of 20 min appears  
497 linear for both strains (competence and non-competence reporters) and was independent of  
498 initial pH of the growth medium. The slope of the curve was computed for each pH value from  
499 the average of the luminescence values measured on four replicates at each time point. A slight  
500 increase of the slope is observed depending on the pH value. This increase appears similar for  
501 the competence and non-competence reporter strains (Figure 5A), and much lower than that



502 obtained when the initial slope was computed for the experiment in which  $36 \text{ ng.ml}^{-1}$  of CSP is  
503 added (Figure 5A). Since no convincing difference was observed between the results obtained  
504 without CSP addition on the strain R1205 and the R1694 control strain, the hypothesis that  
505 ComD alone could be a sensor of pH can be eliminated.

506 The luminescence data were processed for each CSP-pH combination, as previously, to obtain  
507 the average kinetics of ComE concentration per cell. The amount of ComE produced over a  
508 period of 20 minutes immediately after CSP addition was then obtained by calculating the area  
509 under the curve of the ComE time courses. We assumed that this value is proportional to the  
510 initial rate of ComE accumulation and therefore to ComE synthesis rate. The results obtained  
511 when CSP is used to induce the system (Figure 5B) clearly show that the initial pH of the growth  
512 medium acts on the efficiency of competence development. For acidic pH values ( $\leq 7.12$ ) and  
513 at a CSP concentration of  $25 \text{ ng.ml}^{-1}$  very small quantities of ComE are synthesized, and even  
514 at the highest CSP concentration ( $100 \text{ ng.ml}^{-1}$ ) the level of ComE reaches only about half that  
515 obtained at pH 8.19. In particular, a higher quantity of ComE is obtained for cells induced with  
516  $25 \text{ ng.ml}^{-1}$  of CSP at pH 7.57 than for cells induced with  $100 \text{ ng.ml}^{-1}$  of CSP at pH 6.8. For a  
517 given CSP concentration, the more alkaline the medium, the higher the amount of ComE  
518 synthesized. This effect is more pronounced at pH 8.19 where ComE rapidly attains a plateau  
519 at a CSP concentration of  $25 \text{ ng.ml}^{-1}$ . Those results clearly show that the pH of the growth  
520 medium is an important parameter in controlling competence development.

521 To determine whether the model can simulate these experimental data, we assumed that the pH  
522 of the growth medium affects reactions taking place in the extra-cellular environment, namely:  
523 i) interaction between the CSP and ComD and its effect on ComD phosphorylation (Table 1,  
524 reaction (5)), or ii) the CSP degradation rate (Table 1, reaction (12)). Since, HtrA protease  
525 activity, involved in CSP degradation, appears unaffected by pH (Cassone *et al*, 2012), we  
526 deduced that the CSP decay rate is not sensitive to pH variation. Therefore, to mimic the pH  
527 variation, we performed a parameter sweep, jointly, on the affinity of a ComD dimer for CSP  
528 ( $K_{act}$ ) and the maximum rate of CSP-stimulated conversion of the unphosphorylated form of a  
529 ComD dimer into its phosphorylated form ( $v_{maxact}$ ). Indeed, tuning only the values of one of  
530 these two parameters does not reproduce the experimental data. To establish the parameter  
531 scale, we set the values of  $K_{act}$  and  $v_{maxact}$  at pH 7.8 to those previously estimated (4.42 and  
532 10 respectively) for wild-type and *dprA*<sup>-</sup> cells since this pH value was used in these experiments  
533 (Mirouze *et al*, 2013). This parameter sweep was achieved for each of the four CSP  
534 concentrations used to induce the system. Each point on the curves corresponds to the simulated

535 quantity of ComE synthesized over a period of 20 min after CSP addition, obtained as before  
536 by calculating the area under the curve of the ComE time courses.

537 We observe good qualitative agreement between experimental and simulated curves (Figure  
538 5C). In particular, the shape of the experimental curve obtained for the most acidic pH value  
539 (6.8) was reproduced with an amount of ComE that increases linearly and reaches a maximum  
540 of about half the level obtained with the  $K_{act}$  and  $v_{maxact}$  values corresponding to growth  
541 medium with the highest alkaline pH. In the latter case, the simulated values of ComE rapidly  
542 attain a plateau at low CSP concentrations as observed experimentally at pH 8.19. Thus, by  
543 adapting the values of two ODE model parameters involved in phosphorylation of ComD  
544 through its interaction with CSP, we could reproduce the observed experimental data. This  
545 result further validates our modeling and predicts that the initial pH of the growth medium  
546 affects the reaction controlling the activation of ComD through CSP-induced phosphorylation.

547 *Investigating the model's predictive behavior on new aspects of the competence cycle*

548 We next explored how the model predicted the effect of the basal rates of early competence  
549 gene expression on the spontaneous shift to competence and how it can reproduce and explain  
550 the blind-to-CSP period.

551 *Coordinated rates of ComCDE and ComAB basal expression are required to elicit spontaneous*  
552 *competence*

553 Although the model was developed in a context of competence induction by external CSP, we  
554 investigated whether it could simulate the triggering of spontaneous competence. We first tested  
555 the basic idea that over-expression of *comCDE* should lead to derepression of competence. We  
556 followed the network dynamics without adding external CSP for system induction and we  
557 performed a parameter sweep over the ComCDE basal synthesis rate (from  $10^{-5}$  to  $10^{-2}$  a.u. min<sup>-1</sup>  
558 <sup>1</sup>). Contrary to expectation, this basal rate increase does not activate competence but inhibits  
559 competence initiation (Appendix Figure S11A). Computation of protein and peptide amounts  
560 at  $t = 20$  min clearly shows that ComE and intracellular pre-CSP increase according to the rise  
561 in basal synthesis rate whereas the level of mature exported CSP remains constant and very low  
562 (from  $4.3e^{-05}$  to  $5.9e^{-05}$  a.u.), such that ComX and SsbB are not synthesized (Figure 6).  
563 However, when we increase the ComCDE and ComAB basal synthesis rates simultaneously,  
564 competence is restored as shown by appearance of SsbB production at  $t = 20$  min (Figure 6 and  
565 Appendix Figure S11B for protein and peptide level kinetics). We deduce from this result that

566 the export of CSP through ComAB is limiting, as observed experimentally (Martin *et al*, 2000),  
567 leading to an excess of ComE over ComE~P that prevents ComE~P from competing with ComE  
568 for binding to  $P_{comC}$ .

569 Then, for a given value of the basal synthesis rate of ComCDE ( $0.005 \text{ a.u. min}^{-1}$ ), we gradually  
570 increase the ComAB basal synthesis rate from  $0.01 \text{ min}^{-1}$  to  $1 \text{ min}^{-1}$ . Significant synthesis of  
571 SsbB was observed when the basal ComAB synthesis rate reached 0.05, indicating that  
572 activation of the competence state can be restored (Appendix Figure S12). However, as the  
573 basal ComAB synthesis rate decreases, we observe an increasing delay in competence  
574 triggering as estimated by the time required for SsbB to exceed 0.1 a.u. (Figure 7). For example,  
575 this threshold is exceeded at 18 min with a basal ComAB synthesis rate of 1 and only at 38 min  
576 with a basal synthesis rate of 0.05. This is consistent with a more efficient processing of pre-  
577 CSP that allows extracellular CSP to reach the critical concentration required to activate  
578 ComDE, and hence more rapid setting up of the positive feedback loop (Appendix Figure S12).  
579 The ratio ComE~P/ComE at time  $t$  when SsbB exceeds 0.1 a.u., computed for each simulation,  
580 varies from around  $4e^{-03}$  to  $6e^{-03}$ . We propose that below this value, the level of ComE~P is  
581 insufficient to set up the positive feedback loop. All these simulations suggest that a balance  
582 between the basic synthesis rates of ComCDE and ComAB is crucial to triggering spontaneous  
583 competence.

584 *Blind-to-CSP period results from the blocking of the ComD/E pathway through DprA*  
585 *accumulation*

586 After the shut-off phase, the cells are unresponsive to higher concentrations of CSP for 60-80  
587 min, the refractory- or blind-to-CSP period (Chen & Morrison, 1987; Hotchkiss, 1954). It was  
588 suggested that the stability of DprA could explain this insensitivity (Mirouze *et al*, 2013). For  
589 testing whether the model can reproduce the blind-to-CSP period, we simulated this situation  
590 by deducing the consequences of adding CSP to the medium at different times after competence  
591 shut-off estimated at  $t = 50 \text{ min}$  (Figure 8A). We did not obtain an on/off response, but over a  
592 period of 80 min after competence shut-off the response of the cell to CSP addition is less  
593 efficient. We explain this result by the presence, after competence shut-off, of free residual  
594 DprA (not involved in a complex with ComE~P) and an excess of ComE. After a second CSP  
595 addition, the residual ComE and newly synthesized ComE are phosphorylated by a ComD  
596 dimer. However, in the model, the level of residual DprA is insufficient to sequester all the  
597 available ComE~P and a second wave of competence can be initiated. The magnitude of this

598 wave increases progressively with time elapsed since the previous competence shut-off, and by  
599 120 minutes equals that of the first wave. This is consistent with the estimated 120 min effective  
600 stability of DprA in the model (half-life of 83 min). To corroborate this hypothesis, we  
601 performed two additional simulations. In the first, we removed all residual DprA before adding  
602 CSP at the shut-off phase. This precludes the refractory period and a second peak of competence  
603 identical to the first is observed (Figure 8B). In the second simulation, we increased the DprA  
604 level in the cell before the second addition of CSP by changing its current value of 1.35 a.u.  
605 into 2.7 a.u. In this case, the cell is totally unresponsive to the CSP (Figure 8C). Therefore, our  
606 simulated data strengthen the hypothesis that DprA is a main actor in the blind-to-CSP period.

607 To confirm that the refractory period results only from regulation of the early *com* genes by the  
608 ComE/ComE~P ratio, we modified our model to bypass the activation of *comX* and *comW* by  
609 ComE~P. In the ODEs describing the kinetics of ComX and ComW we included a constant  
610 synthesis rate that allows a direct induction of the gene. In such a model, ComX and ComW  
611 can be produced either by the ComE~P pathway or independently by direct induction of both  
612 genes. We ran simulations by adding either CSP or by directly activating *comX* and *comW* at  
613 the end of the shut-off phase (Figure 9A). While the model is almost unresponsive to the second  
614 addition of CSP, it can develop a second wave of competence after direct activation of  
615 *comX/comW* despite the presence of the late protein DprA (Figure 9A). To experimentally  
616 validate our prediction, we took advantage of the previously described inducible CEPr  
617 expression platform (supplementary information in (Johnston *et al*, 2016)). This platform is  
618 controlled by the BlpR/H two-component system (de Saizieu *et al*, 2000) which is activated by  
619 the mature bacteriocin induction peptide (BIP). *comX* and *comW* genes were cloned as an  
620 operon under control of BlpR and introduced into strain R3584 carrying a luciferase gene  
621 expressed from the *ssbB* promoter. This strain, R3932, can produce ComX and ComW either  
622 by the ComE~P pathway or independently by the BlpR/H system. During the competence shut-  
623 off, only BIP addition allows new expression of late competence genes (Figure 9B) as predicted  
624 by the model. These results strongly support the conclusion that the blind-to-CSP period results  
625 from blocking of the ComD/E pathway by DprA accumulation which prevents reappearance of  
626 a ComE~P free pool.

## 627 **Discussion**

628 In this paper we report a mathematical modeling of the genetic circuit governing competence  
629 of *S. pneumoniae* that takes account of all we presently know of the system. Although

630 competence induction and shut-off is well documented, our simulations provide mechanistic  
631 insights into their temporal regulation which we have confirmed experimentally. By mining the  
632 literature on competence regulation we developed an initial cellular scale model of CSP-  
633 induced competence regulation which underlined the incompleteness of our present knowledge  
634 on competence shut-off. Indeed, this initial model shows discrepancies between simulated and  
635 experimental data as pointed out on Figure 3 for the three different genetic backgrounds.  
636 Moreover, despite the integration of the two mechanisms known to be involved in competence  
637 shut-off, our simulation could not reproduce the competence shut-off observed in a *clpP* mutant  
638 where ComX and ComW are stable. We concluded that an unknown actor might be involved  
639 in late gene transcription termination, as proposed by Piotrowski and collaborators (Piotrowski  
640 *et al*, 2009) and Weng and collaborators (Weng *et al*, 2013). Hence, we introduced in our  
641 modeling a hypothetical actor that we named ComZ. To decipher how ComZ acts, we conceived  
642 four alternative hypotheses, while allowing ComZ to be the product of either an early or a late  
643 *com* gene.

644

#### 645 *Competence shut-off is multifactorial*

646 Among the eight alternative models tested (Table 3), that which best reproduces the  
647 experimental data is the one in which ComZ is the product of a late *com* gene that interacts  
648 directly with ComW to impair the formation of the active form of ComX. This model accurately  
649 recapitulates the dynamics of the interlinked ComE- and ComX-dependent transcriptional  
650 cascades. A very good agreement between the simulated and measured kinetics is obtained for  
651 the wild type strain as well as for the *dprA* and *clpP* mutants. Nevertheless, experimental time-  
652 series data are still needed for confirmation of the *clpP* simulation. Recently published data  
653 (Tovpeko *et al*, 2016) support this prediction since they demonstrate that correct shut-off is  
654 ineffective without ComW. The authors proposed that ComW may play a role in the shut-off  
655 of late gene expression, and our simulations predict that ComW is the target of an unknown late  
656 *com* gene product.

657 Another hypothesis concerns competition for core RNA polymerase between the active form  
658 of ComX and the housekeeping  $\sigma^A$  factor, since spontaneous suppressor mutations in a *comW*  
659 background were located in the gene *rpoD* coding for  $\sigma^A$  (Tovpeko & Morrison, 2014). In these  
660 mutants the affinity of  $\sigma^A$  for RNA polymerase could be weakened, thereby promoting  $\sigma^X$   
661 binding. Since the transcriptome results show that *rpoD* behaves like a late *com* gene despite  
662 the absence of an upstream combox (Peterson *et al*, 2000, 2004), this hypothesis would

663 correspond to our second best model, which posits that late ComZ competes with the active  
664 form of ComX for binding to core RNA polymerase. Even if the fit between experimental and  
665 simulated data is not as good as in the best model (compare Figures 4 and S5), especially for  
666 the wild type strain, the hypothesis of competition between  $\sigma^A$  and the active form of  $\sigma^X$  could  
667 not be excluded.

668 To reconcile these two observations, the most parsimonious hypothesis would be that in our  
669 two models the late ComZ corresponds to  $\sigma^A$ , thus fulfilling both functions *viz.* interaction with  
670 ComW to impede the formation of the active form of  $\sigma^X$ , and competition with this active form  
671 for binding to RNA polymerase. Indeed, since a tenfold increase in ComX-dependent *rpoD*  
672 expression is observed, we may assume that it will be followed by an increase of the number of  
673  $\sigma^A$  molecules in the cell. Some of these molecules could interact with ComW for shutting off  
674 the synthesis of the active form of ComX while the others will bind to the core RNA polymerase  
675 to allow the cell to return to its original state of growth. Implementation of this hypothesis in  
676 our modeling gives an AIC value of -5900.4, slightly smaller than that obtained with our best  
677 model, and enhances slightly the fitting of experimental and simulated protein kinetics  
678 (Appendix Figure S13). However, interactions between ComW and  $\sigma^A$  need to be  
679 experimentally clarified as contradictory results have been obtained in two independent studies  
680 using yeast two-hybrid approaches. Indeed, interactions between ComW and  $\sigma^A$  have been  
681 identified by Wuchty and collaborators (Wuchty *et al.*, 2017) but not by Tovpeko and  
682 collaborators (Tovpeko *et al.*, 2016).

683 Therefore, besides the action of DprA in shutting off early *com* gene expression, our modeling  
684 predicts that another mechanism involving ComW and  $\sigma^A$  shuts off late *com* gene expression.  
685 Thus, competence shut-off appears tightly regulated at the transcriptional level both through  
686 control of the ComE master regulator of the early *com* genes and through exclusion of the  $\sigma^X$   
687 factor required for late *com* gene expression.

688

#### 689 *Investigation of system dynamics under specific experimental conditions*

690 We further validated the predictive ability of the model by investigating its behavior on new  
691 aspects of the competence cycle *viz.* the effect of the basal rates of early competence gene  
692 expression on the spontaneous shift to competence, the ability for reproducing the blind-to-CSP  
693 period and the impact of the initial pH of the growth medium on competence development. We  
694 simulated the system dynamics under these specific experimental conditions and made

695 predictions on the system components that could be involved in the observed behaviors.  
696 Experimental approaches were designed to test these predictions.

697 Our prediction that coordinated rates of ComCDE and ComAB basal expression are required  
698 to elicit spontaneous competence has been previously observed experimentally (Martin *et al*,  
699 2000; Guiral *et al*, 2006). The simulated kinetics obtained for ComE, ComE~P and SsbB reveal  
700 an almost constant value of the ratio ComE~P/ComE (between  $4e^{-03}$  and  $6e^{-03}$ ). We propose that  
701 below this value ComE~P cannot compete efficiently with ComE for  $P_{comC}$  binding and so  
702 cannot set up the positive feedback loop. At a deeper level, increased expression specifically of  
703 ComAB shortened the time taken to induce competence and conversely repression of *comAB*  
704 prolonged it (Figure 7 and Figure S12). This conclusion is supported by the behavior of mutants  
705 with raised levels of *comAB* expression (Martin *et al*, 2000; Claverys & Havarstein, 2002). The  
706 simulation results are also correlated with the loss of spontaneous competence induction in a  
707 mutant with a ten-fold increase in the basal level of *comCDE* transcription (Guiral *et al* 2006).  
708 Increased *comAB* gene expression in this mutant restored competence, suggesting that this  
709 phenotype was partly due to an imbalance in the positive feedback loop.

710 Through simulation and experimentation we demonstrate that the blind-to-CSP period is due  
711 to the presence, after competence shut-off, of residual stable DprA proteins that block the  
712 ComD/E pathway through the sequestration of ComE~P, preventing the development of a  
713 second wave of competence.

714 Finally, our mathematical modeling predicts that the pH of the growth medium affects both  
715 affinity of ComD for CSP and CSP-induced ComD autophosphorylation. Indeed, by tuning  
716 concurrently the values of the two corresponding ODE parameters, our simulations can  
717 reproduce the shape of the various experimental curves. We show that signal transduction in  
718 the ComABCDE core sensing machinery detects alkaline pH through a direct effect on the  
719 binding of CSP to ComD, boosting signal transmission. Experimental results obtained for the  
720 histidine kinase AgrC from *S. aureus* have shown that the binding of the cognate ligand to one  
721 or both transmembrane domain(s) of an AgrC homodimer induces or stabilizes a  
722 conformational change in the corresponding cytoplasmic dimerization-histidine-  
723 phosphotransfer subdomains (George Cisar *et al*, 2009). Intermolecular interactions across the  
724 dimer interface induce or stabilize functionally parallel conformations in both protomers. The  
725 concerted formation of the activated conformational state in both protomers leads to the *trans*-  
726 autophosphorylation of each histidine by the contralateral kinase subdomain (George Cisar *et*  
727 *al*, 2009). Alkaline pH, by increasing the affinity of the ComD dimer for CSP, may favor the  
728 conformational change of the cytoplasmic domains and stabilize the active dimer conformation

729 thus increasing the ComD autophosphorylation rate. Acidic pH, by reducing the affinity of the  
730 ComD dimer for CSP, would have the opposite effect.

731

### 732 *Adaptation of the model to other streptococci*

733 While the model was built for *S. pneumoniae*, it could be adapted to other streptococcus species  
734 belonging to the *S. mitis* and *S. anginosus* groups as long as their genomes contain an ortholog  
735 of the *comW* gene. Although the *comCDE*, *comX* and *dprA* genes are conserved in all the species  
736 of these two groups, we were unable to identify orthologs of *comW* in the available genome  
737 sequences of *S. gordonii*, *S. intermedius*, *S. constellatus*, *S. sanguinis*, *S. parasanguinis*, or in  
738 *S. anginosus* with the exception of strains C1051 and J4211. For these species, it remains to be  
739 determined whether other proteins fulfil the roles of ComW in stabilizing and activating ComX  
740 or if ComX does not require any  $\sigma$  factor activator for binding to core RNA polymerase.. In the  
741 latter case, our model should be modified to eliminate reactions involving ComW and to allow  
742 direct synthesis of the active form of ComX through ComE~P activation of *comX* expression.  
743 Otherwise, the model could be used with no adjustment of network topology. However, if  
744 experimental data are available, new parameter values should be estimated in order to better  
745 reflect the dynamic behavior of the network. Indeed, this dynamic may vary according to the  
746 species or even to the strains, as observed with the R800 and CP1250 strains of *S. pneumoniae*  
747 whose delay between early and late *com* gene expression and maximum gene transcription rates  
748 differ (Martin *et al*, 2013).

749

### 750 *Dynamic modeling at the cell population scale in S. pneumoniae*

751 We have developed a model to account for the behavior of an individual cell in the transitory  
752 competence differentiation state in *S. pneumoniae*. The next step is to consider the cell  
753 population. Two recent articles (Prudhomme *et al*, 2016; Moreno-Gómez *et al*, 2017) focused  
754 on spontaneous competence development at the population scale but interpreted the results  
755 obtained differently. Moreno and collaborators (Moreno-Gómez *et al*, 2017) based their  
756 conclusions on classic quorum sensing by the free release of CSP, which leads to a  
757 synchronization of the shift to competence in the whole population. On the other hand,  
758 Prudhomme and collaborators (Prudhomme *et al*, 2016) favor the initiation of competence in a  
759 small fraction of the population that then propagates competence among the non-competent  
760 cells by distributing CSP.

761 The present work will allow, at a minimum, the testing of both hypotheses by its integration  
762 into more complex modeling. Approaches like agent-based or individual-based models (ABMs,



763 IBMs) (Gorochowski *et al*, 2012; Hellweger *et al*, 2016) could be used. These models consider  
764 populations of autonomous agents, each following a set of internal rules and interacting with  
765 each other within a shared virtual environment. Our model can be used to design each agent  
766 and its evolution (competence state shift) over time depending on the environment inputs like  
767 CSP capture through contact with a competent cell and CSP free diffusion. Interactions between  
768 agents, here the cells, can also be defined differently according to the life style of the bacteria  
769 as either planktonic or in biofilm. While in the synchronization model (Moreno-Gómez *et al*,  
770 2017) the cell population is homogeneous, in the competence propagation model (Prudhomme  
771 *et al*, 2016) the design of a dynamic model requires taking into account the non-homogeneity  
772 of the population. The population should contain at least three types of cell: competence-  
773 initiator cells that will develop spontaneous competence, CSP-induced competent cells whose  
774 competence development relies on CSP transmission, and non-competent cells that will not  
775 respond to CSP. If our present cellular model reflects CSP-induced competent cell behavior,  
776 few adjustments will be required to simulate the behavior of the other two cell types. Indeed,  
777 for competence-initiator cells we have already shown that spontaneous competence can be  
778 monitored by tuning the basal expression rates of ComCDE and ComAB. Agent-based or  
779 individual-based models have already been applied to model different biological processes in  
780 microbial populations and open-source platforms have been developed, such as INDISIM, to  
781 simulate the growth and behavior of bacterial colonies (Ginovart *et al*, 2002) - BSim for gene  
782 regulation (Gorochowski *et al*, 2012), Framework for biofilm models (Xavier *et al*, 2005) or  
783 AgentCell for chemotaxis signaling (Emonet & Cluzel, 2008).  
784 Besides its use in the development of a population-scaled model for dynamic study of the  
785 competence circuit in *S. pneumoniae*, our model can be exploited to model more complex  
786 biological processes, such as the cell cycle, where it could be embedded as a module  
787 interconnected with other parts of the network.

788

## 789 **Materials and Methods**

### 790 *Petri net modeling*

791 We implement our Petri net model using Snoopy's framework (Heiner *et al*, 2012; Marwan *et*  
792 *al*, 2012). We used the software Charlie (Heiner *et al*, 2015) to compute the structural invariants  
793 (T- and P- invariants) of the network. A brief, basic introduction to Petri net and structural  
794 invariants calculation is available as supplementary material (Appendix Supplementary

795 Methods). More details on Petri net can be found in (Chaouiya, 2007) and (Koch & Heiner,  
796 2008).

### 797 *Estimations of protein synthesis rates and protein concentration kinetics*

798 Promoter activities were obtained by transformation of the luminescence signal following the  
799 formula proposed by Stefan and collaborators (Stefan *et al*, 2015):

$$800 \quad f(t) = \frac{d}{dt}r(t) + (\gamma_r + \mu(t))r(t) = \frac{\frac{d}{dt}I(t)}{A(t)} + \gamma_r \frac{I(t)}{A(t)}$$

801 where  $A(t)$  corresponds to the background corrected absorbance value,  $I(t)$  to the luminescence  
802 intensity (in relative luminescence units; RLU) over time,  $r(t)=I(t)/A(t)$  to the quantity of  
803 luminescence per cell as a function of time (de Jong *et al*, 2010),  $\gamma_r$  [ $\text{min}^{-1}$ ] to the degradation  
804 constant of the luciferase protein and  $\mu(t)$  [ $\text{min}^{-1}$ ] to the growth rate of the bacteria. The half-  
805 life time of the luciferase used in our experiments was determined to be 15 min (Prudhomme  
806 & Claverys, 2007), leading to  $\gamma_r = 0.04621$ . The reporter signal is expressed in RLU and the  
807 promoter activity in  $\text{RLU min}^{-1}$ .

808 The rate of change in concentration over time of the protein of interest  $p(t)$  [ $\text{RFU min}^{-1}$ ] was  
809 calculated using the following equation (Stefan *et al*, 2015), which corrects for the difference  
810 in half-life between the reporter luciferase and the protein whose gene activity is measured :

$$811 \quad \frac{d}{dt}p(t) = f(t) - (\gamma_p + \mu(t))p(t), \quad p(0) = p_0 = \frac{\mu(T) + \gamma_r}{\mu(T) + \gamma_p} r(T)$$

812 where  $\gamma_p$  [ $\text{min}^{-1}$ ] is the degradation constant of the protein and  $\mu(T)$  is the growth rate of bacteria  
813 at the end of the preculture procedure (at time T). Based on published results and for simplicity,  
814 we considered only two different life times, one for ComD, ComE, DprA and ComAB,  
815 estimated at 80 min ( $t_{1/2} = 55.45$  min and  $\gamma_p = 0.0125$ ) and the other for ComX, ComW and  
816 SsbB, estimated at 8 min ( $t_{1/2} = 5.45$  min and  $\gamma_p = 0.125$ ) ((Piotrowski *et al*, 2009) for ComX  
817 and ComW; (Mirouze *et al*, 2013) for DprA and SsbB; (Martin *et al*, 2013) for ComE and  
818 ComD). We assume that competence gene expression is at steady-state at the beginning of the  
819 experiment, so  $\mu(T) = 0$  and the initial protein concentration  $p_0$  depends only on the protein and  
820 luciferase degradation constants and on the ratio  $r(T)$ .

821 Equations were solved by numerical integration using the Euler method implemented in R  
822 software from the deSolve package. Finally, the protein concentrations obtained were  
823 normalized between 0 and 1 with respect to maximum protein concentration values obtained  
824 over all computed data sets.

### 825 *Model parameter estimation*

826 The parameter inference problem for ordinary differential equation models is usually  
827 formulated as an optimization problem with an objective function that has to be minimized by  
828 adjusting the values of the model parameters. A common choice for computing this objective  
829 function is to calculate the sum of squared errors between measurements and model predictions.  
830 In COPASI, for a set of parameters  $P$ , the objective function is given by the following formula  
831 (Hoops *et al*, 2006):

$$832 \quad E(P) = \sum_{i=1}^n \sum_{j=1}^k \omega_j (x_{i,j} - y_{i,j}(P))^2$$

833 Where  $n$  is the number of data point,  $k$  is the number of variables,  $y_i(P)$  are the simulated data  
834 corresponding to the experimental data  $x_{i,j}$  and  $\omega_j$  is a weight that gives a similar importance in  
835 the fit to all trajectories of each variable. To calculate the weights, we used the mean square  
836 calculation method.

837 The particle swarm algorithm optimization method (PSO) implemented in COPASI (Hoops *et*  
838 *al*, 2006) was used to estimate the parameter values. Details on PSO can be found in (Eberhart  
839 & Kennedy, 1995) and in (Poli *et al*, 2007). We have bounded the parameter search space by  
840 using the constraints set up on the different parameters of the model that are described in the  
841 result section of the manuscript. We run the PSO algorithm by using the default parameters  
842 proposed in COPASI, except for the number of iterations, which was increased from 2000 to  
843 10000.

844 Simulations of the network behavior were performed using LSODA deterministic solver  
845 (Petzold, 1983) for ODE numerical integration. LSODA automatically determines if a system  
846 of ordinary differential equations can be solved more efficiently by a class of methods suited  
847 for non-stiff problems or by a class of methods dedicated to stiff problems. LSODA was run  
848 with the default parameters implemented in COPASI.

849

850 *pH effect on competence development*

851 Neither the *comA* mutant R1205 (Martin *et al*, 2013), which cannot export CSP, nor the *comC*  
852 mutant R1694 (Martin *et al*, 2010), which cannot synthesize it, develop competence naturally,  
853 but both do so upon addition of synthetic CSP. To observe competence development as a  
854 function of CSP concentration and culture medium pH we inoculated C+Y medium (Tomasz  
855 & Hotchkiss, 1964) at pH 7.27 with each strain at OD<sub>550</sub> 0.01 and incubated the cultures at 37°C  
856 until the OD reached 0.12. The cells were then washed by centrifugation/resuspension in the  
857 same medium, concentrated to OD 1, and kept on ice. The cells were diluted to OD ~0.03 in  
858 pre-warmed (37°C) C+Y medium adjusted to the desired pH using NaOH or HCl containing  
859 luciferin, as previously described (Prudhomme & Claverys, 2007). The diluted cells (300 µl of  
860 aliquots) were immediately transferred to clear bottomed wells of a 96-well white NBS micro  
861 plate (Corning) at 37°C. CSP was then added at the desired concentration. Relative  
862 luminescence units (RLU) values were recorded every minute throughout incubation at 37°C  
863 in a Varioskan Flash (Thermo 399 Electron Corporation) luminometer. The pH in replicate  
864 experiments varied slightly from the nominal values but these variations did not significantly  
865 affect the competence induction profiles.

866 *Effect of DprA-mediated blocking of the ComD/E pathway on the blind-to-CSP period*

867 Strain R3932 was constructed as follows: i) strand overlap extension using the primers MB26,-  
868 27,-28,-29 to substitute *comC2* for *comC1* in the strain R1036 by the Janus methods described  
869 in (Sung *et al*, 2001); ii) The strain was then converted to the wild type *rpsL* locus by  
870 transformation (R3369) ; iii) introduction of *ssb::luc* (Martin *et al*, 2000) by transformation to  
871 yield R3584; iv) cloning of a *comXI-comW* fragment created by strand-overlap extension using  
872 primers MB54,-56,-57,-58 between the BamHI and NcoI sites of pCEPR-luc (Johnston *et al*,  
873 2016), and transformation R3584 by the resulting plasmid to yield R3932 (*comC2D1, ssbB::luc*  
874 (*Cm*), *pcepR-comXI-comW (kanR)*). Competence was monitored as above, using the *ssbB::luc*  
875 transcriptional fusion. Inducing peptides were added at final concentrations of 100 ng/mL  
876 (CSP) or 500 ng/mL (BIP). Primer sequences are listed in Appendix Table S2.

877

878 **Data availability**

879 The model was deposited in BioModels (Chelliah *et al*, 2015) and assigned the identifier  
880 MODEL1803300001. The datasets used and/or analyzed during the current study are available  
881 from the corresponding author on request.

## 882 **Acknowledgements**

883 We thank Yves Quentin for its help with analyses of data from growth medium pH value  
884 experiments and for useful discussions during manuscript preparation. We thank Mike  
885 Chandler and Dave Lane for critical reading of the manuscript. This work was supported by  
886 institutional grants from the CNRS (Centre National de la Recherche Scientifique). MW was  
887 supported by an MESR (Ministère de l'Enseignement Supérieur et de la Recherche) fellowship.

## 888 **Author contributions**

889 Conceived and designed the mathematical modeling: GF MW. Conceived and designed the  
890 experiments: MP MB. Performed the theoretical experiments: MW GF. Performed the  
891 biological experiments: MP MB. Analyzed the data: GF MW MP MB PP. Wrote the paper: GF  
892 MP. All authors read and approved the final manuscript.

## 893 **Conflict of interest**

894 The authors declare that they have no conflict of interest.

895

## 896 **References**

897

898 Alloing G, Martin B, Granadel C & Claverys JP (1998) Development of competence in *Streptococcus*  
899 *pneumoniae*: pheromone autoinduction and control of quorum sensing by the oligopeptide  
900 permease. *Mol. Microbiol.* **29**: 75–83

901 Baker SM, Schallau K & Junker BH (2010) Comparison of different algorithms for simultaneous  
902 estimation of multiple parameters in kinetic metabolic models. Available at:  
903 <https://doi.org/10.2390/biecoll-jib-2010-133> [Accessed September 2, 2016]

904 Boudes M, Sanchez D, Graille M, van Tilbeurgh H, Durand D & Quevillon-Cheruel S (2014) Structural  
905 insights into the dimerization of the response regulator ComE from *Streptococcus*  
906 *pneumoniae*. *Nucleic Acids Res.* **42**: 5302–5313

907 Cassone M, Gagne AL, Spruce LA, Seeholzer SH & Seibert ME (2012) The HtrA protease from  
908 *Streptococcus pneumoniae* digests both denatured proteins and the competence-stimulating  
909 peptide. *J. Biol. Chem.* **287**: 38449–38459

910 Chaouiya C (2007) Petri net modelling of biological networks. *Brief. Bioinform.* **8**: 210–219

911 Chelliah V, Juty N, Ajmera I, Ali R, Dumousseau M, Glont M, Hucka M, Jalowicki G, Keating S, Knight-  
912 Schrijver V, Lloret-Villas A, Natarajan KN, Pettit J-B, Rodriguez N, Schubert M, Wimalaratne SM,  
913 Zhao Y, Hermjakob H, Le Novère N & Laibe C (2015) BioModels: ten-year anniversary. *Nucleic*  
914 *Acids Res.* **43**: D542-548

- 915 Chen I & Dubnau D (2004) DNA uptake during bacterial transformation. *Nat. Rev. Microbiol.* **2**: 241–  
916 249
- 917 Chen JD & Morrison DA (1987) Modulation of competence for genetic transformation in *Streptococcus*  
918 *pneumoniae*. *J. Gen. Microbiol.* **133**: 1959–1967
- 919 Chen WW, Niepel M & Sorger PK (2010) Classic and contemporary approaches to modeling  
920 biochemical reactions. *Genes Dev.* **24**: 1861–1875
- 921 Claverys J-P & Havarstein LS (2002) Extracellular-peptide control of competence for genetic  
922 transformation in *Streptococcus pneumoniae*. *Front. Biosci. J. Virtual Libr.* **7**: d1798-1814
- 923 Claverys J-P, Martin B & Håvarstein LS (2007) Competence-induced fratricide in streptococci. *Mol.*  
924 *Microbiol.* **64**: 1423–1433
- 925 Claverys J-P, Prudhomme M & Martin B (2006) Induction of competence regulons as a general  
926 response to stress in gram-positive bacteria. *Annu. Rev. Microbiol.* **60**: 451–475
- 927 Croucher NJ, Harris SR, Fraser C, Quail MA, Burton J, van der Linden M, McGee L, von Gottberg A, Song  
928 JH, Ko KS, Pichon B, Baker S, Parry CM, Lambertsen LM, Shahinas D, Pillai DR, Mitchell TJ,  
929 Dougan G, Tomasz A, Klugman KP, et al (2011) Rapid pneumococcal evolution in response to  
930 clinical interventions. *Science* **331**: 430–434
- 931 Dagkessamanskaia A, Moscoso M, Hénard V, Guiral S, Overweg K, Reuter M, Martin B, Wells J &  
932 Claverys J-P (2004) Interconnection of competence, stress and CiaR regulons in *Streptococcus*  
933 *pneumoniae*: competence triggers stationary phase autolysis of *ciaR* mutant cells. *Mol.*  
934 *Microbiol.* **51**: 1071–1086
- 935 Eberhart R & Kennedy J (1995) A new optimizer using particle swarm theory. In pp 39–43. IEEE  
936 Available at: <http://ieeexplore.ieee.org/document/494215/> [Accessed November 17, 2016]
- 937 Emonet T & Cluzel P (2008) Relationship between cellular response and behavioral variability in  
938 bacterial chemotaxis. *Proc. Natl. Acad. Sci. U. S. A.* **105**: 3304–3309
- 939 Fontaine L, Boutry C, de Frahan MH, Delplace B, Fremaux C, Horvath P, Boyaval P & Hols P (2010) A  
940 novel pheromone quorum-sensing system controls the development of natural competence  
941 in *Streptococcus thermophilus* and *Streptococcus salivarius*. *J. Bacteriol.* **192**: 1444–1454
- 942 Fontaine L, Wahl A, Flécharde M, Mignolet J & Hols P (2015) Regulation of competence for natural  
943 transformation in streptococci. *Infect. Genet. Evol. J. Mol. Epidemiol. Evol. Genet. Infect. Dis.*  
944 **33**: 343–360
- 945 Gardan R, Besset C, Guillot A, Gitton C & Monnet V (2009) The oligopeptide transport system is  
946 essential for the development of natural competence in *Streptococcus thermophilus* strain  
947 LMD-9. *J. Bacteriol.* **191**: 4647–4655
- 948 George Cisar EA, Geisinger E, Muir TW & Novick RP (2009) Symmetric signalling within asymmetric  
949 dimers of the *Staphylococcus aureus* receptor histidine kinase AgrC. *Mol. Microbiol.* **74**: 44–57
- 950 Ginovart M, López D & Valls J (2002) INDISIM, an individual-based discrete simulation model to study  
951 bacterial cultures. *J. Theor. Biol.* **214**: 305–319

- 952 Golubchik T, Brueggemann AB, Street T, Gertz RE, Spencer CCA, Ho T, Giannoulatou E, Link-Gelles R,  
953 Harding RM, Beall B, Peto TEA, Moore MR, Donnelly P, Crook DW & Bowden R (2012)  
954 Pneumococcal genome sequencing tracks a vaccine escape variant formed through a multi-  
955 fragment recombination event. *Nat. Genet.* **44**: 352–355
- 956 Gorochowski TE, Matyjaszkiewicz A, Todd T, Oak N, Kowalska K, Reid S, Tsaneva-Atanasova KT, Savery  
957 NJ, Grierson CS & di Bernardo M (2012) BSim: an agent-based tool for modeling bacterial  
958 populations in systems and synthetic biology. *PLoS One* **7**: e42790
- 959 Guiral S, Hénard V, Granadel C, Martin B & Claverys J-P (2006) Inhibition of competence development  
960 in *Streptococcus pneumoniae* by increased basal-level expression of the ComDE two-  
961 component regulatory system. *Microbiol. Read. Engl.* **152**: 323–331
- 962 Haustenne L, Bastin G, Hols P & Fontaine L (2015) Modeling of the ComRS Signaling Pathway Reveals  
963 the Limiting Factors Controlling Competence in *Streptococcus thermophilus*. *Front. Microbiol.*  
964 **6**: 1413
- 965 Håvarstein LS, Coomaraswamy G & Morrison DA (1995) An unmodified heptadecapeptide pheromone  
966 induces competence for genetic transformation in *Streptococcus pneumoniae*. *Proc. Natl.*  
967 *Acad. Sci. U. S. A.* **92**: 11140–11144
- 968 Heiner M, Herajy M, Liu F, Rohr C & Schwarick M (2012) Snoopy – A Unifying Petri Net Tool. In  
969 *Application and Theory of Petri Nets*, Haddad S & Pomello L (eds) pp 398–407. Berlin,  
970 Heidelberg: Springer Berlin Heidelberg Available at: [http://link.springer.com/10.1007/978-3-642-31131-4\\_22](http://link.springer.com/10.1007/978-3-642-31131-4_22) [Accessed November 17, 2016]
- 972 Heiner M, Schwarick M & Wegener J-T (2015) Charlie – An Extensible Petri Net Analysis Tool. In  
973 *Application and Theory of Petri Nets and Concurrency*, Devillers R & Valmari A (eds) pp 200–  
974 211. Cham: Springer International Publishing Available at:  
975 [http://link.springer.com/10.1007/978-3-319-19488-2\\_10](http://link.springer.com/10.1007/978-3-319-19488-2_10) [Accessed September 1, 2016]
- 976 Hellweger FL, Clegg RJ, Clark JR, Plugge CM & Kreft J-U (2016) Advancing microbial sciences by  
977 individual-based modelling. *Nat. Rev. Microbiol.* **14**: 461–471
- 978 Hoops S, Sahle S, Gauges R, Lee C, Pahle J, Simus N, Singhal M, Xu L, Mendes P & Kummer U (2006)  
979 COPASI—a COMplex PATHway SIMulator. *Bioinforma. Oxf. Engl.* **22**: 3067–3074
- 980 Hotchkiss RD (1954) CYCLICAL BEHAVIOR IN PNEUMOCOCCAL GROWTH AND TRANSFORMABILITY  
981 OCCASIONED BY ENVIRONMENTAL CHANGES. *Proc. Natl. Acad. Sci. U. S. A.* **40**: 49–55
- 982 Johnsborg O & Håvarstein LS (2009) Regulation of natural genetic transformation and acquisition of  
983 transforming DNA in *Streptococcus pneumoniae*. *FEMS Microbiol. Rev.* **33**: 627–642
- 984 Johnston C, Campo N, Bergé MJ, Polard P & Claverys J-P (2014a) *Streptococcus pneumoniae*, le  
985 transformiste. *Trends Microbiol.* **22**: 113–119
- 986 Johnston C, Hauser C, Hermans PWM, Martin B, Polard P, Bootsma HJ & Claverys J-P (2016) Fine-tuning  
987 of choline metabolism is important for pneumococcal colonization: Regulation of choline  
988 utilization in *S. pneumoniae*. *Mol. Microbiol.* **100**: 972–988
- 989 Johnston C, Martin B, Fichant G, Polard P & Claverys J-P (2014b) Bacterial transformation: distribution,  
990 shared mechanisms and divergent control. *Nat. Rev. Microbiol.* **12**: 181–196

- 991 de Jong H, Ranquet C, Ropers D, Pinel C & Geiselman J (2010) Experimental and computational  
992 validation of models of fluorescent and luminescent reporter genes in bacteria. *BMC Syst. Biol.*  
993 **4**: 55
- 994 Karlsson D, Karlsson S, Gustafsson E, Normark BH & Nilsson P (2007) Modeling the regulation of the  
995 competence-evoking quorum sensing network in *Streptococcus pneumoniae*. *Biosystems* **90**:  
996 211–223
- 997 Koch I & Heiner M (2008) Petri Nets. In *Wiley Series on Bioinformatics: Computational Techniques and*  
998 *Engineering*, Junker BH & Schreiber F (eds) pp 139–179. Hoboken, NJ, USA: John Wiley & Sons,  
999 Inc. Available at: <http://doi.wiley.com/10.1002/9780470253489.ch7> [Accessed September 1,  
1000 2016]
- 1001 Lange R, Wagner C, de Saizieu A, Flint N, Molnos J, Stieger M, Caspers P, Kamber M, Keck W & Amrein  
1002 KE (1999) Domain organization and molecular characterization of 13 two-component systems  
1003 identified by genome sequencing of *Streptococcus pneumoniae*. *Gene* **237**: 223–234
- 1004 Lee MS & Morrison DA (1999) Identification of a new regulator in *Streptococcus pneumoniae* linking  
1005 quorum sensing to competence for genetic transformation. *J. Bacteriol.* **181**: 5004–5016
- 1006 Leisner M, Kuhr J-T, Rädler JO, Frey E & Maier B (2009) Kinetics of genetic switching into the state of  
1007 bacterial competence. *Biophys. J.* **96**: 1178–1188
- 1008 Lin J, Zhu L & Lau GW (2016) Disentangling competence for genetic transformation and virulence in  
1009 *Streptococcus pneumoniae*. *Curr. Genet.* **62**: 97–103
- 1010 Luo P, Li H & Morrison DA (2004) Identification of ComW as a new component in the regulation of  
1011 genetic transformation in *Streptococcus pneumoniae*. *Mol. Microbiol.* **54**: 172–183
- 1012 Luo P & Morrison DA (2003) Transient association of an alternative sigma factor, ComX, with RNA  
1013 polymerase during the period of competence for genetic transformation in *Streptococcus*  
1014 *pneumoniae*. *J. Bacteriol.* **185**: 349–358
- 1015 Maamar H & Dubnau D (2005) Bistability in the *Bacillus subtilis* K-state (competence) system requires  
1016 a positive feedback loop. *Mol. Microbiol.* **56**: 615–624
- 1017 Maamar H, Raj A & Dubnau D (2007) Noise in gene expression determines cell fate in *Bacillus subtilis*.  
1018 *Science* **317**: 526–529
- 1019 Martin B, García P, Castanié MP & Claverys JP (1995) The *recA* gene of *Streptococcus pneumoniae* is  
1020 part of a competence-induced operon and controls lysogenic induction. *Mol. Microbiol.* **15**:  
1021 367–379
- 1022 Martin B, Granadel C, Campo N, Hénard V, Prudhomme M & Claverys J-P (2010) Expression and  
1023 maintenance of ComD-ComE, the two-component signal-transduction system that controls  
1024 competence of *Streptococcus pneumoniae*. *Mol. Microbiol.* **75**: 1513–1528
- 1025 Martin B, Prudhomme M, Alloing G, Granadel C & Claverys JP (2000) Cross-regulation of competence  
1026 pheromone production and export in the early control of transformation in *Streptococcus*  
1027 *pneumoniae*. *Mol. Microbiol.* **38**: 867–878
- 1028 Martin B, Quentin Y, Fichant G & Claverys J-P (2006) Independent evolution of competence regulatory  
1029 cascades in streptococci? *Trends Microbiol.* **14**: 339–345



- 1030 Martin B, Soulet A-L, Mirouze N, Prudhomme M, Mortier-Barrière I, Granadel C, Noirot-Gros M-F,  
1031 Noirot P, Polard P & Claverys J-P (2013) ComE/ComE~P interplay dictates activation or  
1032 extinction status of pneumococcal X-state (competence). *Mol. Microbiol.* **87**: 394–411
- 1033 Marwan W, Rohr C & Heiner M (2012) Petri nets in Snoopy: a unifying framework for the graphical  
1034 display, computational modelling, and simulation of bacterial regulatory networks. *Methods*  
1035 *Mol. Biol. Clifton NJ* **804**: 409–437
- 1036 Mirouze N, Bergé MA, Soulet A-L, Mortier-Barrière I, Quentin Y, Fichant G, Granadel C, Noirot-Gros M-  
1037 F, Noirot P, Polard P, Martin B & Claverys J-P (2013) Direct involvement of DprA, the  
1038 transformation-dedicated RecA loader, in the shut-off of pneumococcal competence. *Proc.*  
1039 *Natl. Acad. Sci. U. S. A.* **110**: E1035-1044
- 1040 Moreno-Gámez S, Sorg RA, Domenech A, Kjos M, Weissing FJ, van Doorn GS & Veening J-W (2017)  
1041 Quorum sensing integrates environmental cues, cell density and cell history to control  
1042 bacterial competence. *Nat. Commun.* **8**: Available at:  
1043 <http://www.nature.com/articles/s41467-017-00903-y> [Accessed November 14, 2017]
- 1044 Oggioni MR, Trappetti C, Kadioglu A, Cassone M, Iannelli F, Ricci S, Andrew PW & Pozzi G (2006) Switch  
1045 from planktonic to sessile life: a major event in pneumococcal pathogenesis. *Mol. Microbiol.*  
1046 **61**: 1196–1210
- 1047 Pestova EV, Håvarstein LS & Morrison DA (1996) Regulation of competence for genetic transformation  
1048 in *Streptococcus pneumoniae* by an auto-induced peptide pheromone and a two-component  
1049 regulatory system. *Mol. Microbiol.* **21**: 853–862
- 1050 Peterson S, Cline RT, Tettelin H, Sharov V & Morrison DA (2000) Gene expression analysis of the  
1051 *Streptococcus pneumoniae* competence regulons by use of DNA microarrays. *J. Bacteriol.* **182**:  
1052 6192–6202
- 1053 Peterson SN, Sung CK, Cline R, Desai BV, Snesrud EC, Luo P, Walling J, Li H, Mintz M, Tsegaye G, Burr  
1054 PC, Do Y, Ahn S, Gilbert J, Fleischmann RD & Morrison DA (2004) Identification of competence  
1055 pheromone responsive genes in *Streptococcus pneumoniae* by use of DNA microarrays. *Mol.*  
1056 *Microbiol.* **51**: 1051–1070
- 1057 Petzold L (1983) Automatic Selection of Methods for Solving Stiff and Nonstiff Systems of Ordinary  
1058 Differential Equations. *SIAM J. Sci. Stat. Comput.* **4**: 136–148
- 1059 Piotrowski A, Luo P & Morrison DA (2009) Competence for genetic transformation in *Streptococcus*  
1060 *pneumoniae*: termination of activity of the alternative sigma factor ComX is independent of  
1061 proteolysis of ComX and ComW. *J. Bacteriol.* **191**: 3359–3366
- 1062 Poli R, Kennedy J & Blackwell T (2007) Particle swarm optimization. *Swarm Intell.* **1**: 33–57
- 1063 Prudhomme M, Berge M, Martin B & Polard P (2016) Pneumococcal Competence Coordination Relies  
1064 on a Cell-Contact Sensing Mechanism. *PLoS Genet.* **12**: e1006113
- 1065 Prudhomme M & Claverys JP (2007) There will be a light: the use of luc transcriptional fusions in living  
1066 pneumococcal cells. In *The Molecular Biology of Streptococci* pp 519–524. R. Hakenbeck and  
1067 G. S. Chhatwal, Norwich, UK: Horizon Scientific Press Available at: [https://hal.archives-](https://hal.archives-ouvertes.fr/hal-00211464)  
1068 [ouvertes.fr/hal-00211464](https://hal.archives-ouvertes.fr/hal-00211464)

- 1069 de Saizieu A, Gardès C, Flint N, Wagner C, Kamber M, Mitchell TJ, Keck W, Amrein KE & Lange R (2000)  
1070 Microarray-based identification of a novel *Streptococcus pneumoniae* regulon controlled by  
1071 an autoinduced peptide. *J. Bacteriol.* **182**: 4696–4703
- 1072 Sanchez D, Boudes M, van Tilbeurgh H, Durand D & Quevillon-Cheruel S (2015) Modeling the  
1073 ComD/ComE/comcde interaction network using small angle X-ray scattering. *FEBS J.* **282**:  
1074 1538–1553
- 1075 Schultz D, Ben Jacob E, Onuchic JN & Wolynes PG (2007) Molecular level stochastic model for  
1076 competence cycles in *Bacillus subtilis*. *Proc. Natl. Acad. Sci. U. S. A.* **104**: 17582–17587
- 1077 Schultz D, Lu M, Stavropoulos T, Onuchic J & Ben-Jacob E (2013) Turning Oscillations Into  
1078 Opportunities: Lessons from a Bacterial Decision Gate. *Sci. Rep.* **3**: Available at:  
1079 <http://www.nature.com/articles/srep01668> [Accessed November 17, 2016]
- 1080 Schultz D, Wolynes PG, Ben Jacob E & Onuchic JN (2009) Deciding fate in adverse times: sporulation  
1081 and competence in *Bacillus subtilis*. *Proc. Natl. Acad. Sci. U. S. A.* **106**: 21027–21034
- 1082 Son M, Ahn S-J, Guo Q, Burne RA & Hagen SJ (2012) Microfluidic study of competence regulation in  
1083 *Streptococcus mutans*: environmental inputs modulate bimodal and unimodal expression of  
1084 comX. *Mol. Microbiol.* **86**: 258–272
- 1085 Stefan D, Pinel C, Pinhal S, Cinquemani E, Geiselmann J & de Jong H (2015) Inference of quantitative  
1086 models of bacterial promoters from time-series reporter gene data. *PLoS Comput. Biol.* **11**:  
1087 e1004028
- 1088 Süel GM, Garcia-Ojalvo J, Liberman LM & Elowitz MB (2006) An excitable gene regulatory circuit  
1089 induces transient cellular differentiation. *Nature* **440**: 545–550
- 1090 Sung CK, Li H, Claverys JP & Morrison DA (2001) An rpsL cassette, janus, for gene replacement through  
1091 negative selection in *Streptococcus pneumoniae*. *Appl. Environ. Microbiol.* **67**: 5190–5196
- 1092 Sung CK & Morrison DA (2005) Two distinct functions of ComW in stabilization and activation of the  
1093 alternative sigma factor ComX in *Streptococcus pneumoniae*. *J. Bacteriol.* **187**: 3052–3061
- 1094 Tomasz A (1997) Antibiotic resistance in *Streptococcus pneumoniae*. *Clin. Infect. Dis. Off. Publ. Infect.*  
1095 *Dis. Soc. Am.* **24 Suppl 1**: S85-88
- 1096 Tomasz A & Hotchkiss RD (1964) REGULATION OF THE TRANSFORMABILITY OF PNEUMOCOCCAL  
1097 CULTURES BY MACROMOLECULAR CELL PRODUCTS. *Proc. Natl. Acad. Sci. U. S. A.* **51**: 480–487
- 1098 Tovpeko Y, Bai J & Morrison DA (2016) Competence for Genetic Transformation in *Streptococcus*  
1099 *pneumoniae*: Mutations in  $\sigma$ A Bypass the ComW Requirement for Late Gene Expression. *J.*  
1100 *Bacteriol.* **198**: 2370–2378
- 1101 Tovpeko Y & Morrison DA (2014) Competence for genetic transformation in *Streptococcus*  
1102 *pneumoniae*: mutations in  $\sigma$ A bypass the comW requirement. *J. Bacteriol.* **196**: 3724–3734
- 1103 Trappetti C, Gualdi L, Di Meola L, Jain P, Korir CC, Edmonds P, Iannelli F, Ricci S, Pozzi G & Oggioni MR  
1104 (2011) The impact of the competence quorum sensing system on *Streptococcus pneumoniae*  
1105 biofilms varies depending on the experimental model. *BMC Microbiol.* **11**: 75

- 1106 Vidal JE, Howery KE, Ludewick HP, Nava P & Klugman KP (2013) Quorum-sensing systems  
1107 LuxS/autoinducer 2 and Com regulate *Streptococcus pneumoniae* biofilms in a bioreactor with  
1108 living cultures of human respiratory cells. *Infect. Immun.* **81**: 1341–1353
- 1109 Wang B, Zhao A, Novick RP & Muir TW (2014) Activation and inhibition of the receptor histidine kinase  
1110 AgrC occurs through opposite helical transduction motions. *Mol. Cell* **53**: 929–940
- 1111 Weng L, Piotrowski A & Morrison DA (2013) Exit from competence for genetic transformation in  
1112 *Streptococcus pneumoniae* is regulated at multiple levels. *PLoS One* **8**: e64197
- 1113 Wuchty S, Rajagopala SV, Blazie SM, Parrish JR, Khuri S, Finley RL & Uetz P (2017) The Protein  
1114 Interactome of *Streptococcus pneumoniae* and Bacterial Meta-interactomes Improve  
1115 Function Predictions. *mSystems* **2**:
- 1116 Xavier JB, Picioareanu C & van Loosdrecht MCM (2005) A framework for multidimensional modelling of  
1117 activity and structure of multispecies biofilms. *Environ. Microbiol.* **7**: 1085–1103
- 1118 Zhu L, Lin J, Kuang Z, Vidal JE & Lau GW (2015) Deletion analysis of *Streptococcus pneumoniae* late  
1119 competence genes distinguishes virulence determinants that are dependent or independent  
1120 of competence induction. *Mol. Microbiol.* **97**: 151–165

1121

## 1122 **Figure Legends**

### 1123 **Figure 1 Overview of the competence regulatory network in *S. pneumoniae* and its Petri net** 1124 **modeling**

1125 (A) Competence develops in response to a competence-stimulating peptide (CSP) which is first  
1126 synthesized as a precursor form (pre-CSP) encoded by *comC*. The pre-CSP is matured and  
1127 exported by the dedicated ABC transporter ComAB. Extracellular CSP binds the histidine  
1128 kinase ComD and triggers autophosphorylation. ComD~P activates its cognate response  
1129 regulator ComE by transferring its phosphoryl group. ComE~P activates the transcription of  
1130 early *com* genes which include the *comCDE* and *comAB* operons, establishing a positive  
1131 feedback loop. Early *com* genes also comprise *comX* and *comW*. *comX* encodes  $\sigma^X$ , the  
1132 competence-specific  $\sigma$  factor that requires ComW for improving its binding to core RNA  
1133 polymerase. Since the mechanisms that underlie the action of ComW are still unknown, we  
1134 simplify the scheme by considering that transcription is ensured by a complex composed of  
1135  $\sigma^X$ /ComW/RNA polymerase.  $\sigma^X$  controls the activation of large set of late *com* genes  
1136 represented here by *ssbB*, which is commonly used in experimental assays as reporter gene for  
1137 late gene expression, and *dprA* whose gene product is involved in competence shut-off by  
1138 sequestering ComE~P. Competence shut-off also involves ComE, which inhibits *comCDE*  
1139 transcription by outcompeting ComE~P for binding to  $P_{comC}$ . The green arrows represent

1140 activation of gene expression, the red lines represent inhibition reactions and the black arrows  
1141 represent other reactions like synthesis, binding or export reactions. (B) Petri net model. Circles  
1142 correspond to places and represent proteins involved in the system. Squares correspond to  
1143 transitions and represent the system reactions. Places and transitions are connected by directed  
1144 weighted arcs (arrows) whose associated number corresponds to the stoichiometric coefficient  
1145 of the reaction when it differs from one. Places are colored according to the color code adopted  
1146 in (A). Names of places and transitions are indicated. Bidirectional arrows represent test arcs.

## 1147 **Figure 2 Promoter activities and protein kinetics deduced from luminescence data**

1148 Promoter activities per cell computed from normalized raw luminescence signals are  
1149 represented by black lines (right scale). Reconstructed protein kinetics corrected for differences  
1150 in half-lives between luciferase and the protein whose gene activity is measured are represented  
1151 by colored lines (left scale). Solid and dashed lines correspond to computed values obtained  
1152 from raw luminescence data in WT and *dprA*<sup>-</sup> strains respectively (Mirouze *et al*, 2013). The  
1153 protein life times used for computation are: 8 min for ComX and SsbB, 80 min for ComD and  
1154 ComE and 21.6 min for luciferase (Prudhomme & Claverys, 2007). The *comD* and *comE* genes  
1155 being in an operon, the blue line represents both ComD<sub>total</sub> as ComE<sub>total</sub> kinetics. Red and green  
1156 lines depict ComX<sub>total</sub> and SsbB kinetics respectively. Promoter activities and protein  
1157 concentrations have been normalized with respect to the maximum values obtained over all  
1158 computed data sets; therefore values are given in arbitrary units (a.u.).

## 1159 **Figure 3 Comparison of experimental and simulated protein kinetics obtained with the** 1160 **initial model**

1161 Comparison of simulated data with the experimental measurements are shown for the WT  
1162 strain, the *dprA* mutant strain and the *clpP* mutant strain. Since luminescence data was not  
1163 available for the *clpP* mutant, they were generated using the WT dataset and ComX kinetics  
1164 was inferred by setting ComX degradation constant  $\gamma_{comX}$  to 0. For the two other strains,  
1165 reconstructed protein kinetics correspond to those of figure 2. Experimental and simulated data  
1166 are represented by crosses and solid lines respectively. In the *dprA* mutant the simulated protein  
1167 kinetics were obtained by setting the DprA maximal synthesis rate ( $v_{max,dprA}$ ) to 0. In the *clpP*  
1168 mutant both ComX ( $\gamma_{comX}$ ) and ComW ( $\gamma_{comW}$ ) degradation constants were designated as 0.  
1169 Competence gene expression was assumed to be at steady-state at the beginning of the  
1170 simulation, and competence development was induced by adding one arbitrary unit (a.u.) of  
1171 CSP (corresponding to 100 ng/mL) at  $t = 10$  min in order to reproduce the experimental protocol

1172 (100 ng/mL added after 10 min incubation (Mirouze *et al*, 2013)). The same color code as in  
1173 Figure 2 is used. Major discrepancies between experimental and simulated data are circled and  
1174 indicated by an arrow.

1175 **Figure 4 Comparison of experimental and simulated protein kinetics obtained with the**  
1176 **modified selected model**

1177 An unknown late gene product ComZ interacting with ComW and preventing the transition  
1178 from the inactive to the active form of ComX has been introduced in the initial model.  
1179 Experimental and simulated conditions are the same as in Figure 3 as is the color code. Arrows  
1180 indicate the major discrepancies between experimental and simulated data observed in Figure  
1181 3, showing that the new model greatly enhances the fitting between both curves.

1182 **Figure 5 The initial pH value of the growth medium affects the comCDE circuit**

1183 (A) For a given pH value of the growth medium, each red and green point corresponds to the  
1184 slope of the curve computed from the average of the luminescence values measured on the four  
1185 replicates at each time point over the first 20 min of the experiment for the strain R1205 (red)  
1186 and the R1694 control strain (green) respectively (left scale). The purple points correspond to  
1187 the initial slope of the curve calculated over the first 3 min of the experiment for each pH value  
1188 when 36ng/ml of CSP is added in the medium (right scale). The confidence interval on the slope  
1189 is plotted. (B) Each point of the curves corresponds to the quantity of ComE synthesized over  
1190 a period of 20 min after CSP addition for each CSP-pH combination tested experimentally. This  
1191 quantity is obtained by calculating the area under the curve of the kinetics of ComE and is  
1192 normalized with respect to the maximum value of ComE synthesized over all experiments. CSP  
1193 concentrations used in the experiments: 0, 25, 50 and 100 ng/mL. Strain used:  $P_{comC}::luc$  R1205.  
1194 (C) Each point of the curves corresponds to the simulated quantity of ComE<sub>total</sub> synthesized  
1195 over a period of 20 min after CSP addition. Protein amounts are calculated as in (B) and  
1196 normalized with respect to the maximum value of ComE synthesized over all simulations.  
1197 Simulations are performed by tuning the two ODE parameters corresponding to the affinity of  
1198 a ComD dimer for the CSP ( $K_{act}$ ) and CSP-induced autophosphorylation rate of ComD dimer  
1199 ( $vmax_{act}$ ). CSP amounts used in simulations: 0, 0.25, 0.5, 1 a.u.  $comA^-$  is simulated by setting  
1200  $\beta_{comAB} = 0$  (basal synthesis rate of ComAB) and  $vmax_{comAB} = 0$  (maximal synthesis rate of  
1201 ComAB).

1202 **Figure 6 Both basal synthesis rates of *comAB* and *comCDE* influence spontaneous**  
1203 **competence development**

1204 Comparison of the protein and peptide levels computed à  $t = 20$  min when the simulated  
1205 network dynamics is followed without external CSP addition for a ComCDE basal synthesis  
1206 rate ( $\beta_{comCDE}$ ) varying from  $10^{-5}$  to  $10^{-2}$  a.u.  $\text{min}^{-1}$ . Dark color bars show the results obtained  
1207 when the exporter basal synthesis rate ( $\beta_{comAB}$ ) keeps a constant value corresponding to that  
1208 estimated in our model (Table 4). Light color bars display the values obtained when  $\beta_{comAB}$   
1209 varies conjointly with  $\beta_{comCDE}$  with  $\beta_{comAB} = 100 * \beta_{comCDE}$ .

1210 **Figure 7 Efficient export of matured pre-CSP promotes establishment of the positive**  
1211 **feedback loop**

1212 Time delay measured for competence triggering estimated as the time required for SsbB to  
1213 exceed 0.1 a.u. in network simulations where, for a fixed value of the ComCDE basal synthesis  
1214 rate ( $0.005 \text{ a.u. min}^{-1}$ ), the ComAB basal synthesis rate ( $\beta_{comAB}$ ) is gradually increased from  
1215  $0.01 \text{ min}^{-1}$  to  $1 \text{ min}^{-1}$ . For  $\beta_{comAB}$  equal to  $0.01$  and  $0.02 \text{ min}^{-1}$ , SsbB does not exceed the defined  
1216 threshold.

1217 **Figure 8 DprA has a major role in the blind-to-CSP period**

1218 (A) SsbB kinetics obtained in five independent simulations. In each simulation, the external  
1219 CSP is added twice: at time  $t = 10$  min in all experiments and at time  $t = 50, 90, 130, 170, 210$   
1220 in the experiments corresponding respectively to 0, 40, 80, 120 and 160 min after competence  
1221 shut-off. (B) Simulated SsbB kinetics where competence is initially induced by addition of  
1222 external CSP at 10 min and the system cleared of residual DprA protein one minute before the  
1223 second addition of CSP at  $t = 90$  min, *i.e.*, 30 min after competence shut-off. The removal of  
1224 residual DprAs is achieved by changing its current protein level (1.35 a.u.) into its estimated  
1225 initial value in our model (0.25 a.u.). (C) Simulated SsbB kinetics obtained as in (B) but where  
1226 the level of DprA is increased one minute before the second addition of external CSP by  
1227 changing its current value (1.35 a.u.) to 2.7 a.u. The dotted line indicates the second addition of  
1228 CSP at  $t = 90$  min.

1229 **Figure 9 Bypassing the ComD/E pathway for ComX and ComW synthesis suppresses the**  
1230 **blind-to-CSP period**

1231 (A) Simulation of SsbB kinetics by the modified model, allowing the synthesis of ComX and  
1232 ComW either dependent on or independent of the ComCDE regulatory pathway. The simulation  
1233 of the direct induction of ComX and ComW synthesis is achieved by shifting the value of the  
1234 new constant synthesis rate from 0 to 0.1 a.u. min<sup>-1</sup> at the time of induction. In the absence of  
1235 either external CSP addition or direct induction, competence is not induced (red curve).  
1236 Competence development is observed either after CSP addition at  $t = 14$  (blue curve) or after  
1237 direct induction at  $t = 60$  (orange curve). The system is refractory to CSP added 60 min after  
1238 competence shut-off (pink curve). A second wave of competence is observed if, after the first  
1239 addition of CSP at  $t = 14$ , ComX and ComW are directly induced at  $t = 60$  (green curve). Blue  
1240 and green curves are superimposed for the first peak of competence. (B) SsbB kinetics from  
1241 normalized raw luminescence data reconstructed by applying the mathematical model of Stefan  
1242 and collaborators (Stefan *et al*, 2015). Normalized experimental luminescence measurements  
1243 are represented by dots. Curves were smoothed using the R function *loess* with a span parameter  
1244 value of 0.2. *S. pneumoniae* R3932 is inoculated in C+Y medium at OD 550nm 0.008 (see  
1245 experimental procedures). R3932 strain produces ComX and ComW following addition of  
1246 either CSP or BIP. 100 ng/mL of external CSP is added at  $t = 14$  and 60 min. 500 ng/mL of  
1247 external BIP is added at  $t = 60$ . The experiment was performed three times, with similar results.

A

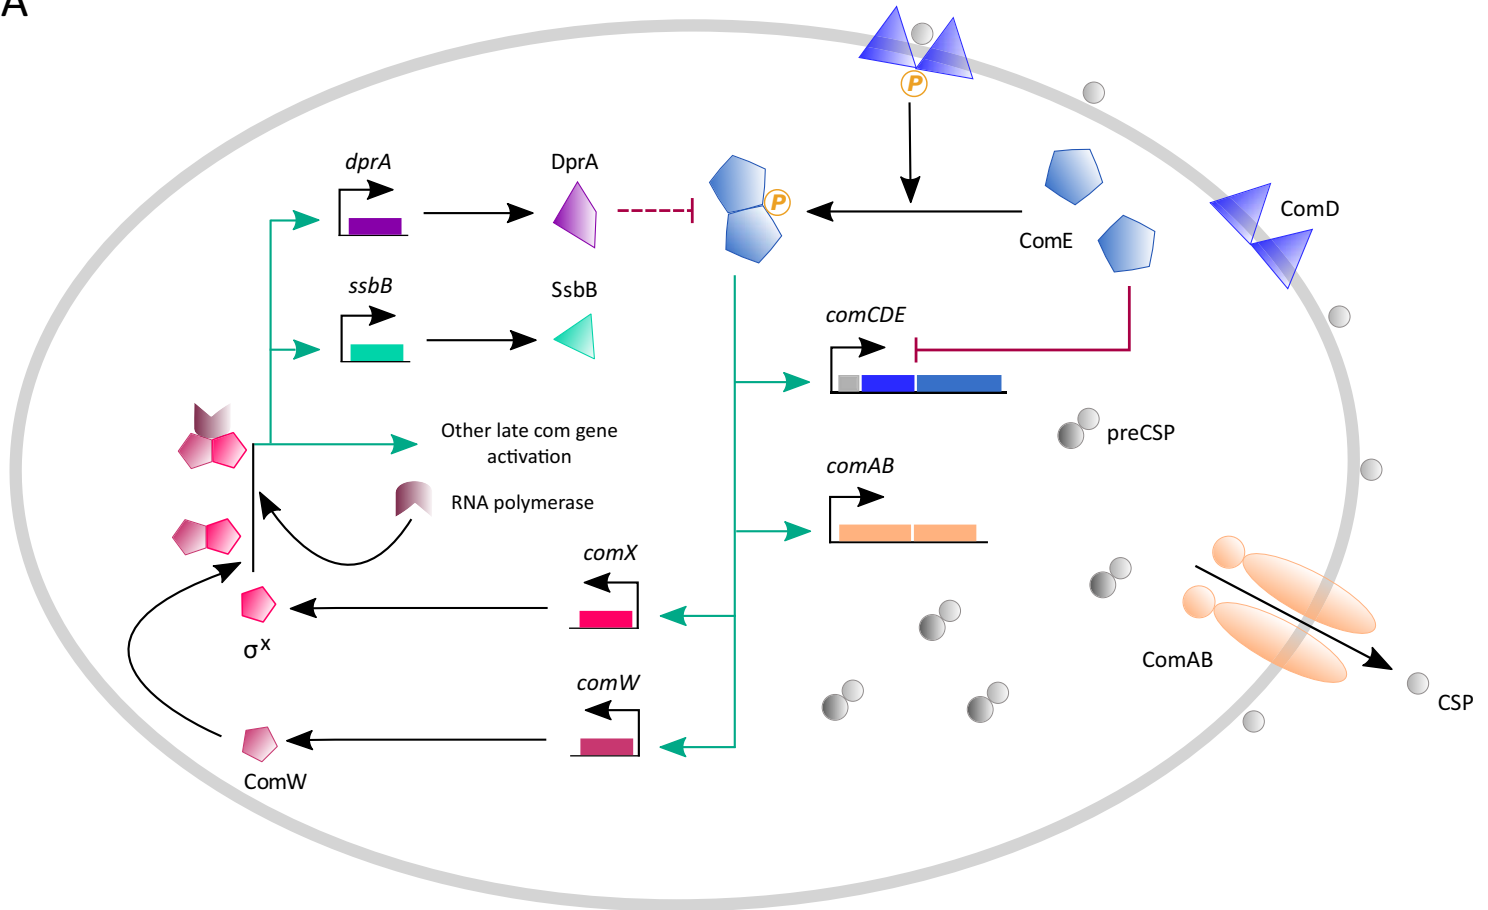

B

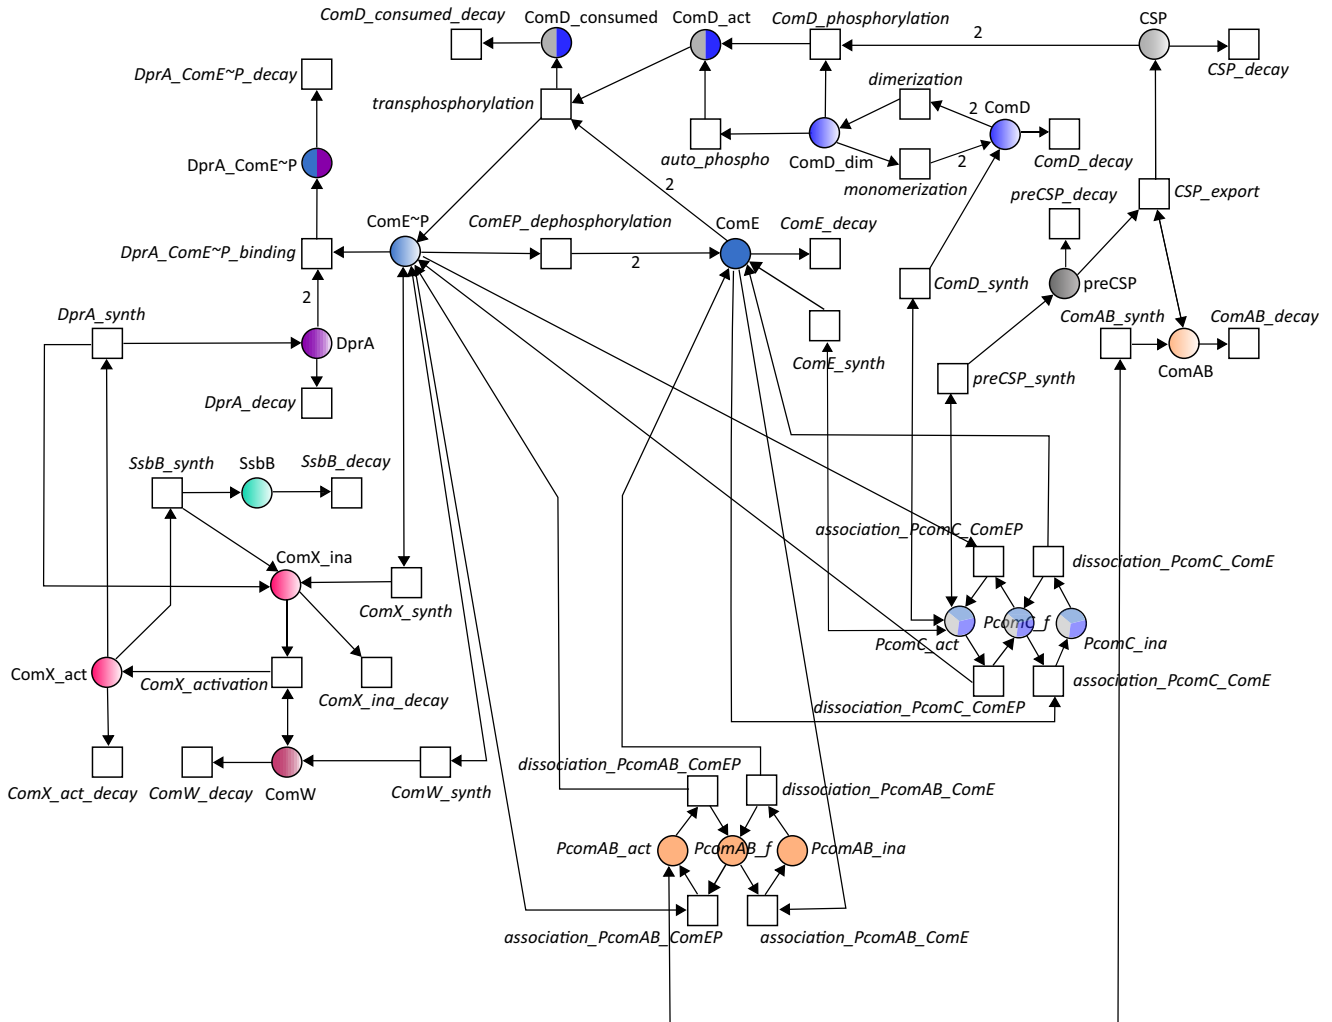



ComD/ComE kinetic

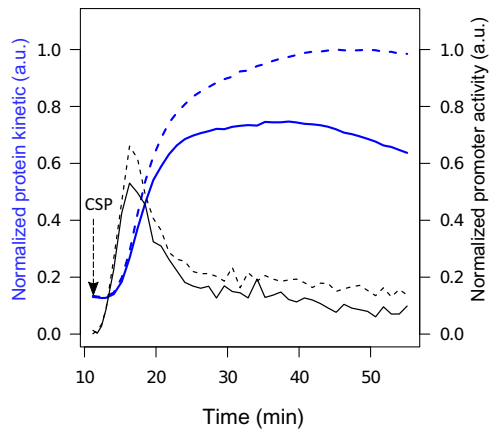

ComX kinetic

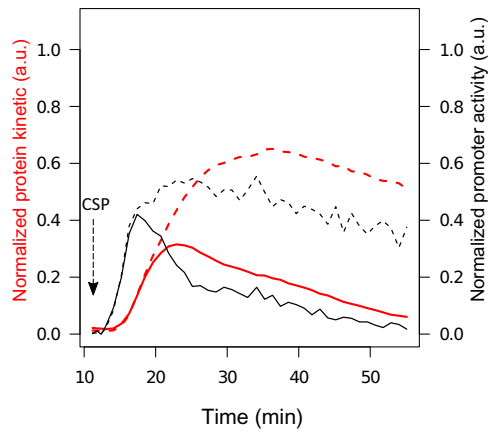

SsbB kinetic

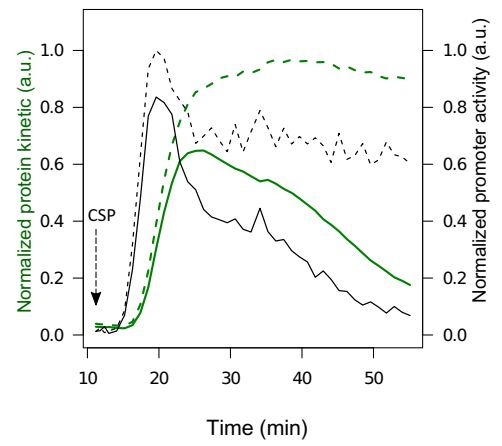

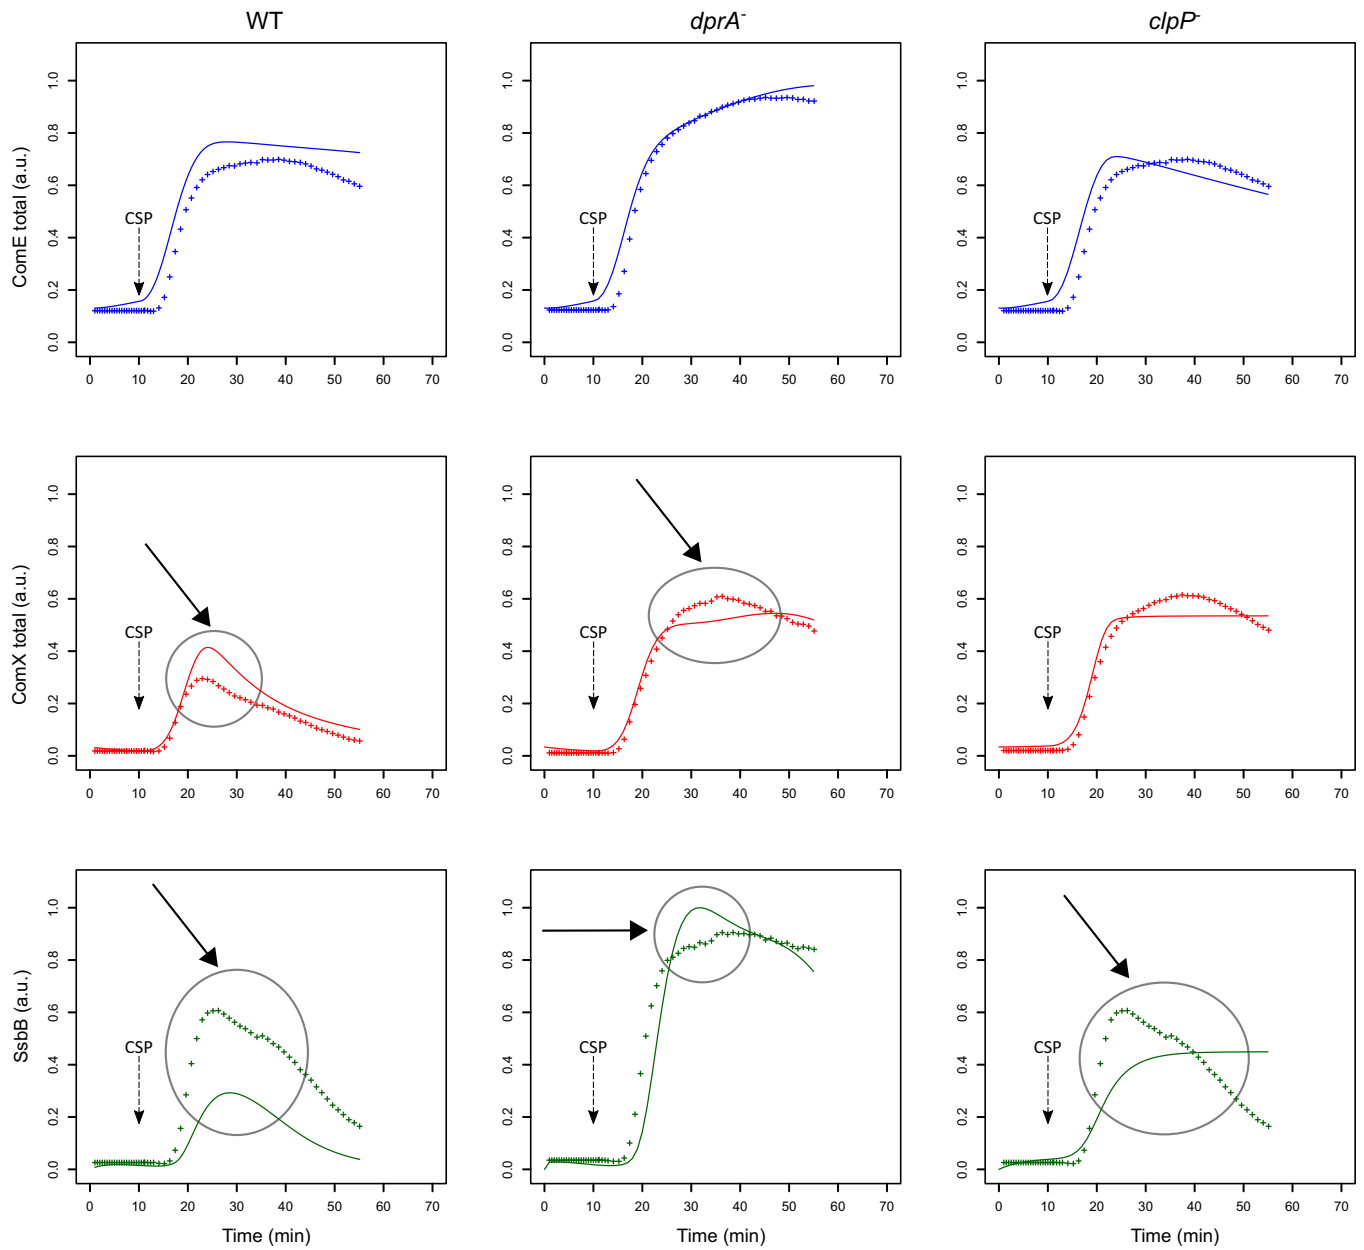

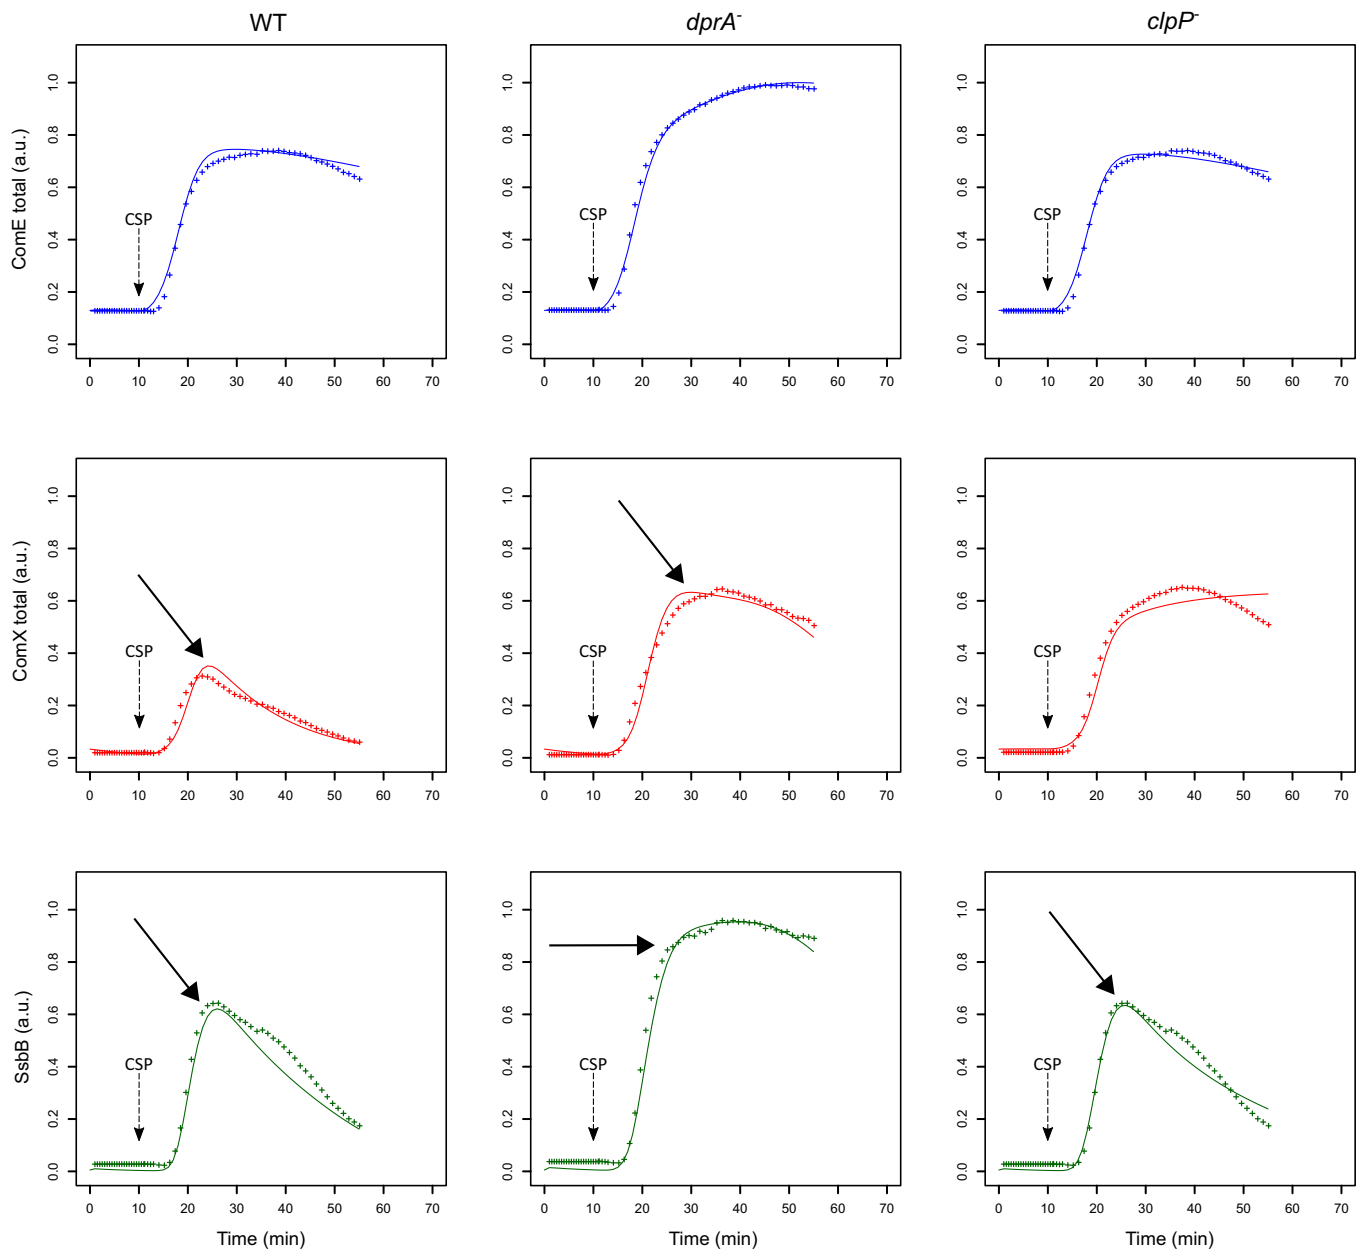

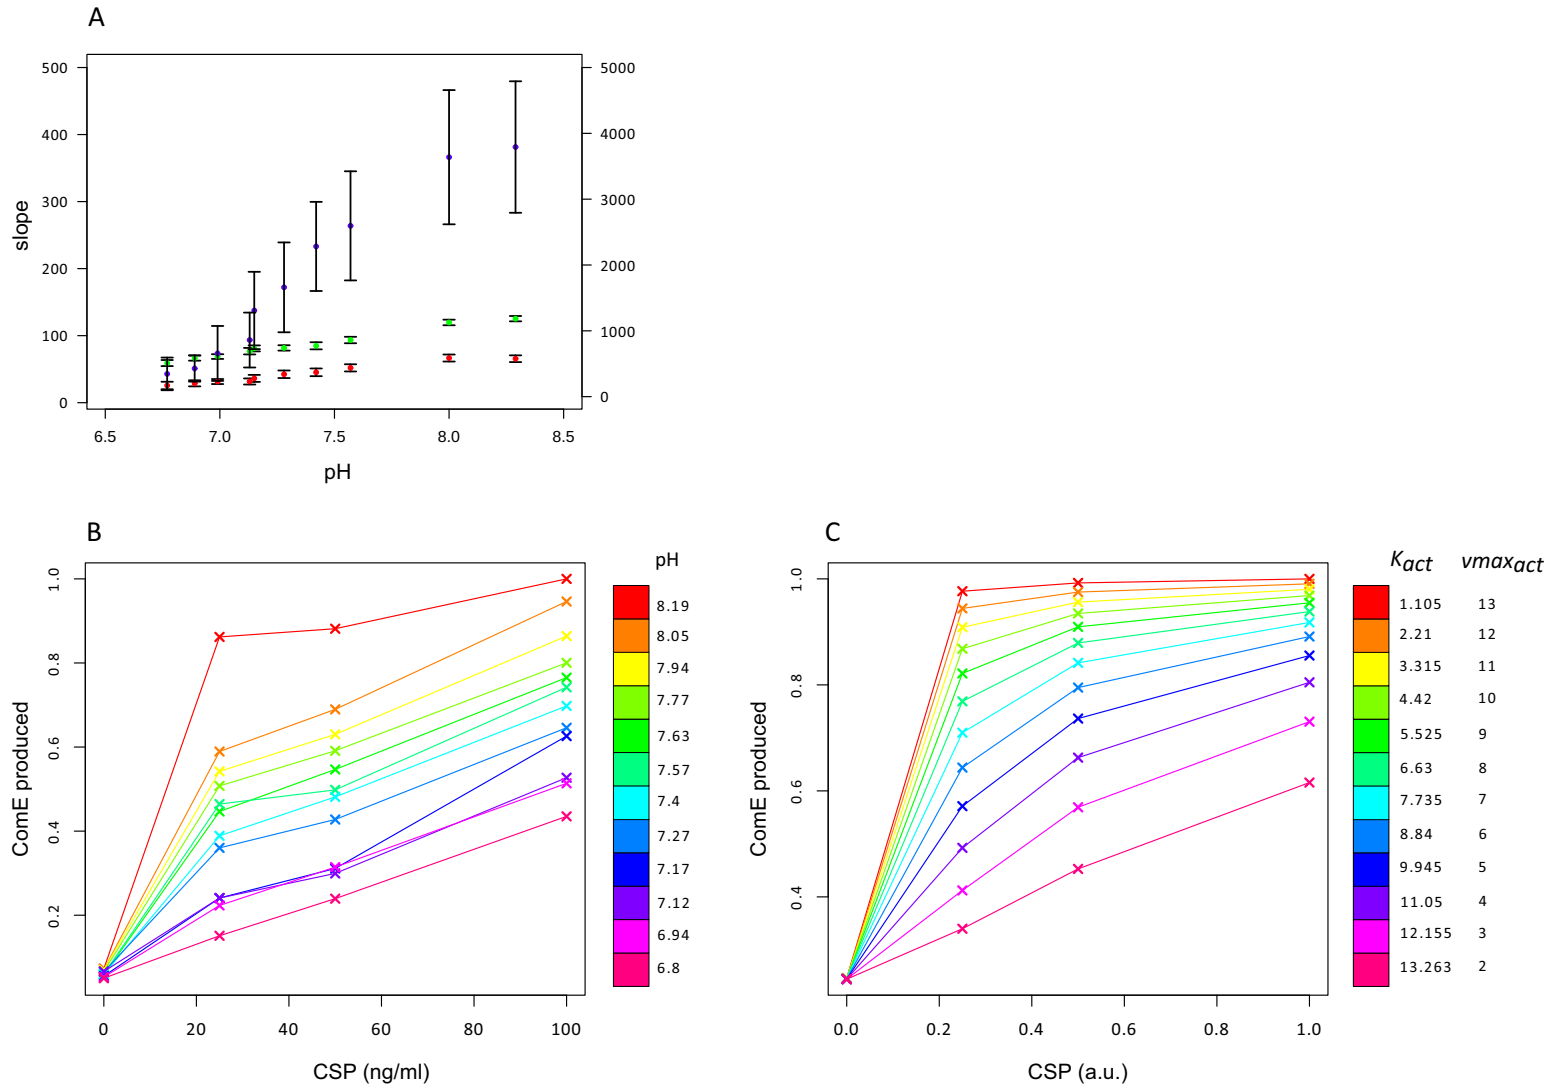

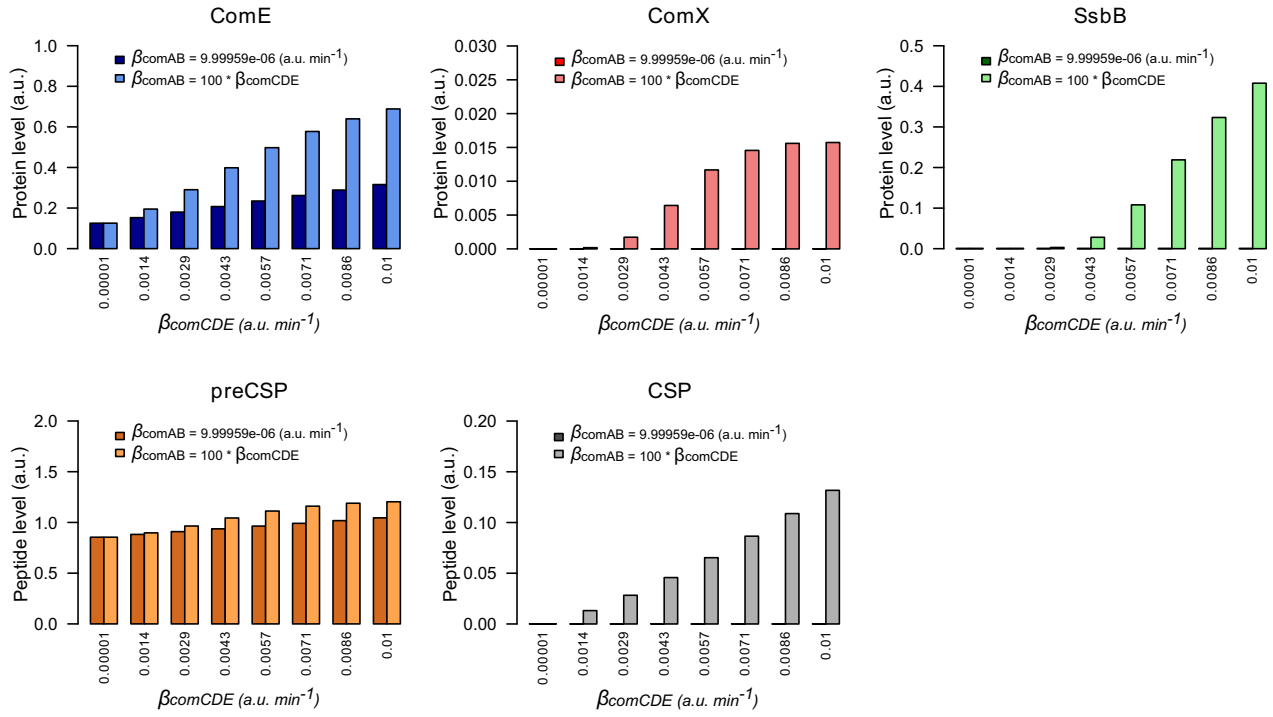

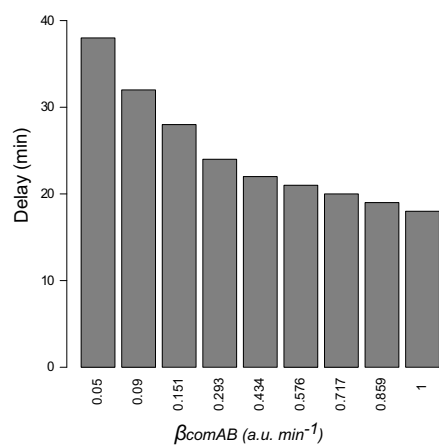

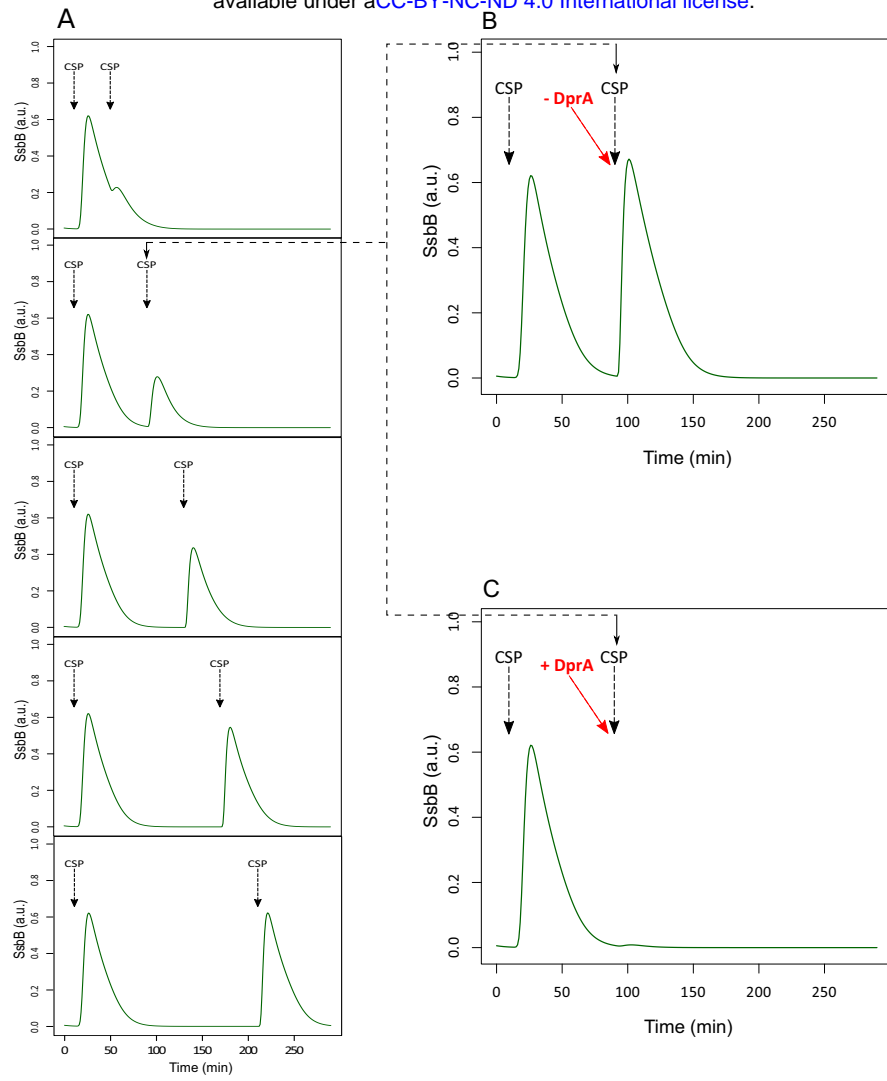

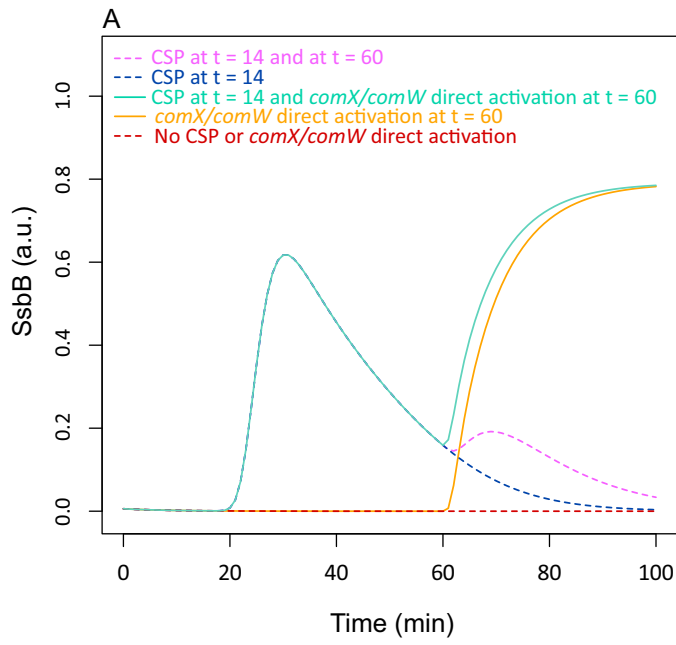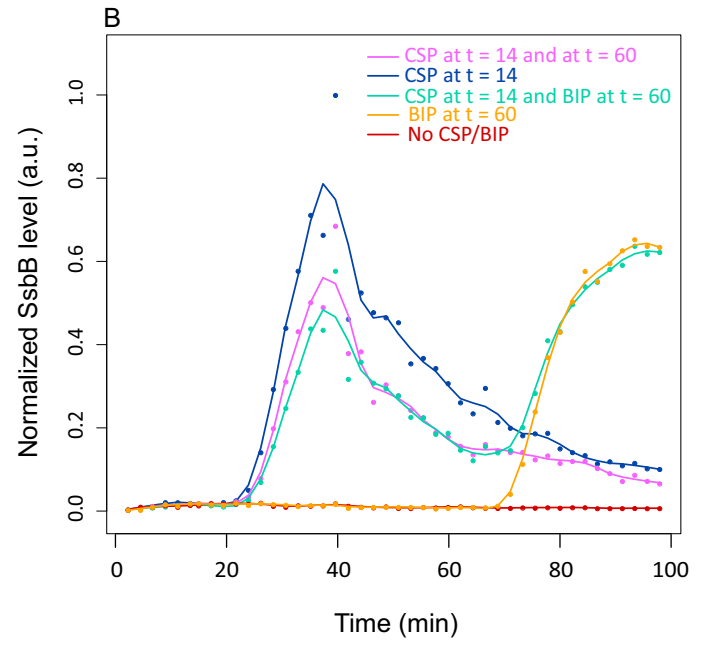



**Table 1**  
Reactions involved in competence regulation

| Description                                                                                                           | Reaction number | Reaction                                                                                                                                                                                                                                                                                                                                                                                                                                                                                                      | Petri net transition                                                                                                                                                                            |
|-----------------------------------------------------------------------------------------------------------------------|-----------------|---------------------------------------------------------------------------------------------------------------------------------------------------------------------------------------------------------------------------------------------------------------------------------------------------------------------------------------------------------------------------------------------------------------------------------------------------------------------------------------------------------------|-------------------------------------------------------------------------------------------------------------------------------------------------------------------------------------------------|
| <i>Maturation and export of comC product (pre-CSP) by the dedicated ABC transporter ComAB</i>                         | 1               | $\text{pre-CSP} + \text{ComAB} \rightarrow \text{CSP} + \text{ComAB}$                                                                                                                                                                                                                                                                                                                                                                                                                                         | CSP_export                                                                                                                                                                                      |
| <i>Dimerization of the histidine kinase ComD</i>                                                                      | 2               | $2 \text{ ComD} \rightarrow (\text{ComD})_D$                                                                                                                                                                                                                                                                                                                                                                                                                                                                  | dimerization                                                                                                                                                                                    |
| <i>Dissociation of <math>(\text{ComD})_D</math></i>                                                                   | 3               | $(\text{ComD})_D \rightarrow 2 \text{ ComD}$                                                                                                                                                                                                                                                                                                                                                                                                                                                                  | monomerization                                                                                                                                                                                  |
| <i>Basal autophosphorylation of <math>(\text{ComD})_D</math></i>                                                      | 4               | $(\text{ComD})_D \text{ phosphates} \rightarrow (\text{ComD}_{\text{act}})_D$                                                                                                                                                                                                                                                                                                                                                                                                                                 | auto_phospho                                                                                                                                                                                    |
| <i>CSP-induced autophosphorylation of <math>(\text{ComD})_D</math></i>                                                | 5               | $2 \text{ CSP} + (\text{ComD})_D + \text{phosphates} \rightarrow (\text{ComD}_{\text{act}})_D$                                                                                                                                                                                                                                                                                                                                                                                                                | ComD_phosphorylation                                                                                                                                                                            |
| <i>Activation of ComE as a dimer by phosphoryl group transfer from <math>(\text{ComD}_{\text{act}})_D</math></i>      | 6               | $(\text{ComD}_{\text{act}})_D + 2 \text{ ComE} \rightarrow (\text{ComE}\sim\text{P})_D + (\text{ComD}\text{-CSP})_D$                                                                                                                                                                                                                                                                                                                                                                                          | transphosphorylation                                                                                                                                                                            |
| <i>Self-catalyzed dephosphorylation of <math>(\text{ComE}\sim\text{P})_D</math></i>                                   | 7               | $(\text{ComE}\sim\text{P})_D \rightarrow 2 \text{ ComE} + \text{phosphates}$                                                                                                                                                                                                                                                                                                                                                                                                                                  | ComEP_dephosphorylation                                                                                                                                                                         |
| <i>Early com gene product synthesis through activation of their genes by <math>(\text{ComE}\sim\text{P})_D</math></i> | 8               | $(\text{ComE}\sim\text{P})_D \rightarrow \text{ComE} + \text{ComD} + \text{ComAB} + \text{pre-CSP} + \text{ComW} + \text{ComX}_{\text{ina}} + (\text{ComE}\sim\text{P})_D$                                                                                                                                                                                                                                                                                                                                    | ComD_synth; ComE_synt;<br>ComAB_synth;<br>preCSP_synth;<br>ComW_synth;<br>ComX_synth                                                                                                            |
| <i>ComX activation</i>                                                                                                | 9               | $\text{ComX}_{\text{ina}} + \text{ComW} \rightarrow \text{ComX}_{\text{act}} + \text{ComW}$                                                                                                                                                                                                                                                                                                                                                                                                                   | ComX_activation                                                                                                                                                                                 |
| <i>Late com gene product synthesis through activation of their genes by the active sigma factor ComX</i>              | 10              | $\text{ComX}_{\text{act}} \rightarrow \text{ComX}_{\text{ina}} + \text{DprA} + \text{SsbB}$                                                                                                                                                                                                                                                                                                                                                                                                                   | DprA_synth; SsbB_synth                                                                                                                                                                          |
| <i>Inactivation of <math>\text{ComE}\sim\text{P}</math> by sequestration in a complex with DprA</i>                   | 11              | $2 \text{ DprA} + (\text{ComE}\sim\text{P})_D \rightarrow (\text{DprA}\text{-ComE}\sim\text{P})_D$                                                                                                                                                                                                                                                                                                                                                                                                            | DprA_ComEP_binding                                                                                                                                                                              |
| <i>Degradation of network components</i>                                                                              | 12              | $\text{pre-CSP} \rightarrow \emptyset; \text{ComAB} \rightarrow \emptyset; \text{CSP} \rightarrow \emptyset; \text{ComD} \rightarrow \emptyset; (\text{ComD}\text{-CSP})_D \rightarrow \emptyset; \text{ComE} \rightarrow \emptyset; \text{ComX}_{\text{act}} \rightarrow \emptyset; \text{ComX}_{\text{ina}} \rightarrow \emptyset; \text{ComW} \rightarrow \emptyset; \text{DprA} \rightarrow \emptyset; \text{SsbB} \rightarrow \emptyset; (\text{DprA}\text{-ComE}\sim\text{P})_D \rightarrow \emptyset;$ | preCSP_decay; ComAB_decay; CSP_decay;<br>ComD_decay;<br>ComD_consumed_decay;<br>ComE_decay;<br>ComX_act_decay;<br>ComXina_decay;<br>ComW_decay;<br>DprA_decay; SsbB_decay<br>DprA-ComE~P_decay; |

**Table 2**  
Ordinary differential equations of the initial model

$$\begin{aligned} \frac{d[\text{preCSP}]}{dt} &= \beta_{\text{ComCDE}} + v\text{max}_{\text{ComCDE}} \frac{[(\text{ComE} \sim \text{P})_D]}{[(\text{ComE} \sim \text{P})_D] + K_{\text{ComE} \sim \text{P}} \left(1 + \frac{[\text{ComE}]^e}{K_{i_{\text{ComE}}^e}}\right)} - \varepsilon * [\text{ComAB}] * [\text{preCSP}] - \gamma_{\text{preCSP}} * [\text{preCSP}] \\ \frac{d[\text{CSP}]}{dt} &= \varepsilon * [\text{ComAB}] * [\text{preCSP}] - 2 v\text{max}_{\text{act}} * \frac{[\text{CSP}]}{[\text{CSP}] + K_{\text{act}}} * [(\text{ComD})_D] - \gamma_{\text{CSP}} * [\text{CSP}] \\ \frac{d[\text{ComAB}]}{dt} &= \beta_{\text{ComAB}} + v\text{max}_{\text{ComAB}} \frac{[(\text{ComE} \sim \text{P})_D]}{[(\text{ComE} \sim \text{P})_D] + K_{\text{ComE} \sim \text{P}_{AB}} \left(1 + \frac{[\text{ComE}]^e}{K_{i_{\text{ComE}_{AB}}^e}}\right)} - \gamma_{\text{ComAB}} * [\text{ComAB}] \\ \frac{d[\text{ComD}]}{dt} &= \beta_{\text{ComCDE}} + v\text{max}_{\text{ComCDE}} \frac{[(\text{ComE} \sim \text{P})_D]}{[(\text{ComE} \sim \text{P})_D] + K_{\text{ComE} \sim \text{P}} \left(1 + \frac{[\text{ComE}]^e}{K_{i_{\text{ComE}}^e}}\right)} - 2 * k_{\text{on}_D} * [\text{ComD}]^2 \\ &\quad + 2 * k_{\text{off}_D} * [(\text{ComD})_D] - \gamma_{\text{ComD}} * [\text{ComD}] \\ \frac{d[(\text{ComD})_D]}{dt} &= k_{\text{on}_D} * [\text{ComD}]^2 - k_{\text{off}_D} * [(\text{ComD})_D] - v\text{max}_{\text{act}} * \frac{[\text{CSP}]}{[\text{CSP}] + K_{\text{act}}} * [(\text{ComD})_D] - \alpha_{\text{auto}} * [(\text{ComD})_D] \\ \frac{d[(\text{ComD}_{\text{act}})_D]}{dt} &= v\text{max}_{\text{act}} * \frac{[\text{CSP}]}{[\text{CSP}] + K_{\text{act}}} * [(\text{ComD})_D] + \alpha_{\text{auto}} * [(\text{ComD})_D] - \lambda * [\text{ComE}]^2 * [(\text{ComD}_{\text{act}})_D] \\ \frac{d[(\text{ComD}_{\text{consumed}})_D]}{dt} &= \lambda * [\text{ComE}]^2 * [(\text{ComD}_{\text{act}})_D] - \gamma_{\text{ComD}} * [(\text{ComD}_{\text{consumed}})_D] \\ \frac{d[\text{ComE}]}{dt} &= \beta_{\text{ComCDE}} + v\text{max}_{\text{ComCDE}} \frac{[(\text{ComE} \sim \text{P})_D]}{[(\text{ComE} \sim \text{P})_D] + K_{\text{ComE} \sim \text{P}} \left(1 + \frac{[\text{ComE}]^e}{K_{i_{\text{ComE}}^e}}\right)} + 2 * \rho * [(\text{ComE} \sim \text{P})_D] \\ &\quad - 2 * \lambda * [\text{ComE}]^2 * [(\text{ComD}_{\text{act}})_D] - \gamma_{\text{ComE}} * [\text{ComE}] \\ \frac{d[(\text{ComE} \sim \text{P})_D]}{dt} &= \lambda * [\text{ComE}]^2 * [(\text{ComD}_{\text{act}})_D] - k_{\text{on}_{DprA_{EP}}} * [DprA]^2 * [(\text{ComE} \sim \text{P})_D] - \rho * [(\text{ComE} \sim \text{P})_D] \\ \frac{d[\text{ComX}_{\text{ina}}]}{dt} &= v\text{max}_{\text{ComX}} * \frac{[(\text{ComE} \sim \text{P})_D]^x}{[(\text{ComE} \sim \text{P})_D]^x + K_{\text{ComX}}^x} + v\text{max}_{DprA} * \frac{[\text{ComX}_{\text{act}}]^d}{[\text{ComX}_{\text{act}}]^d + K_{DprA}^d} \\ &\quad + v\text{max}_{SsbB} * \frac{[\text{ComX}_{\text{act}}]^s}{[\text{ComX}_{\text{act}}]^s + K_{SsbB}^s} - \omega_1 * [\text{ComW}] * [\text{ComX}_{\text{ina}}] - \gamma_{\text{ComX}} * [\text{ComX}_{\text{ina}}] \\ \frac{d[\text{ComX}_{\text{act}}]}{dt} &= \omega_1 * [\text{ComW}] * [\text{ComX}_{\text{ina}}] - v\text{max}_{DprA} * \frac{[\text{ComX}_{\text{act}}]^d}{[\text{ComX}_{\text{act}}]^d + K_{DprA}^d} - v\text{max}_{SsbB} * \frac{[\text{ComX}_{\text{act}}]^s}{[\text{ComX}_{\text{act}}]^s + K_{SsbB}^s} \\ &\quad - \gamma_{\text{ComX}} * [\text{ComX}_{\text{act}}] \\ \frac{d[\text{ComW}]}{dt} &= v\text{max}_{\text{ComW}} * \frac{[(\text{ComE} \sim \text{P})_D]^w}{[(\text{ComE} \sim \text{P})_D]^w + K_{\text{ComW}}^w} - \gamma_{\text{ComW}} * [\text{ComW}] \\ \frac{d[DprA]}{dt} &= v\text{max}_{DprA} * \frac{[\text{ComX}_{\text{act}}]^d}{[\text{ComX}_{\text{act}}]^d + K_{DprA}^d} - 2 * k_{\text{on}_{DprA_{EP}}} * [DprA]^2 * [(\text{ComE} \sim \text{P})_D] - \gamma_{DprA} * [DprA] \\ \frac{d[(DprA_{\text{ComE} \sim \text{P}})_D]}{dt} &= k_{\text{on}_{DprA_{EP}}} * [DprA]^2 * [(\text{ComE} \sim \text{P})_D] - \gamma_{DprA} * [(DprA_{\text{ComE} \sim \text{P}})_D] \\ \frac{d[SsbB]}{dt} &= v\text{max}_{SsbB} * \frac{[\text{ComX}_{\text{act}}]^s}{[\text{ComX}_{\text{act}}]^s + K_{SsbB}^s} - \gamma_{SsbB} * [SsbB] \\ [\text{ComD}]_{\text{total}} &= [\text{ComD}] + 2 * [(\text{ComD})_D] + 2 * [(\text{ComD}_{\text{act}})_D] + 2 * [(\text{ComD}_{\text{consumed}})_D] \\ [\text{ComE}]_{\text{total}} &= [\text{ComE}] + 2 * [(\text{ComE} \sim \text{P})_D] + 2 * [(DprA_{\text{ComE} \sim \text{P}})_D] \\ [\text{ComX}]_{\text{total}} &= [\text{ComX}_{\text{ina}}] + [\text{ComX}_{\text{act}}] \\ [DprA]_{\text{total}} &= [DprA] + 2 * [(DprA_{\text{ComE} \sim \text{P}})_D] \end{aligned}$$

**Table 3**

Akaike's Information Criterion (AIC) computed for each candidate model

| Alternative models                                                                                                                                            | RSS <sup>&amp;</sup> | Parameter | AIC <sup>&amp;&amp;</sup> |
|---------------------------------------------------------------------------------------------------------------------------------------------------------------|----------------------|-----------|---------------------------|
| Interaction between ComW and a late <i>com</i> gene product ComZ impairs ComW activity (Figure 4)                                                             | 0.33                 | 44        | -5760.95                  |
| Competition between the active form of ComX and a late <i>com</i> gene product ComZ for RNA polymerase binding (Figure S4)                                    | 0.44                 | 50        | -5522.92                  |
| Competition between ComW and a late <i>com</i> gene product ComZ for the inactive form of ComX impairs the formation of the active form of ComX (Figure S5)   | 0.54                 | 47        | -5382.64                  |
| Interaction between ComW and an early <i>com</i> gene product ComZ impairs ComW activity (Figure S6)                                                          | 0.63                 | 44        | -5272.10                  |
| Competition between the active form of ComX and an early <i>com</i> gene product ComZ for RNA polymerase binding (Figure S7)                                  | 0.74                 | 48        | -5137.34                  |
| Competition between ComW and an early <i>com</i> gene product ComZ for the inactive form of ComX impairs the formation of the active form of ComX (Figure S8) | 1.58                 | 47        | -4572.90                  |
| Inhibition of the active form of ComX by a late <i>com</i> gene product ComZ (Figure S9)                                                                      | 2.47                 | 44        | -4239.21                  |
| <b>Initial model based on current biological knowledge without involving an additional ComZ partner (Figure 3)</b>                                            | <b>2.63</b>          | <b>39</b> | <b>-4220.38</b>           |
| Inhibition of the active form of ComX by an early <i>com</i> gene product ComZ (Figure S10)                                                                   | 3.32                 | 44        | -4015.63                  |

<sup>&</sup> Residual squared sum<sup>&&</sup>  $AIC = n \ln\left(\frac{RSS}{n}\right) + 2k$  where  $k$  is the number of estimated model parameters,  $n$  is the number of observations (756) and  $RSS$  is the sum of squared residuals of the fitted model

**Table 4**

Description and numerical values of parameters from the selected alternative model

| Parameter            | Description                                                                                                                          | Value <sup>&amp;</sup>               |
|----------------------|--------------------------------------------------------------------------------------------------------------------------------------|--------------------------------------|
| $B_{ComCDE}$         | Basal synthesis rate for ComC (Pre-CSP), ComD and ComE                                                                               | 1.00009e-05 (a.u.min <sup>-1</sup> ) |
| $B_{ComAB}$          | Basal synthesis rate for ComAB                                                                                                       | 9.99959e-06 (a.u.min <sup>-1</sup> ) |
| $\alpha_{auto}$      | (ComD) <sub>D</sub> basal auto-phosphorylation rate                                                                                  | 9.99972e-07 (a.u.min <sup>-1</sup> ) |
| $v_{maxComCDE}$      | Maximal synthesis rate of ComC (pre-CSP), ComD and ComE                                                                              | 7.18016 (a.u.min <sup>-1</sup> )     |
| $v_{maxComAB}$       | Maximal synthesis rate of ComAB                                                                                                      | 1.62831 (a.u.min <sup>-1</sup> )     |
| $v_{maxComX}$        | Maximal synthesis rate of ComX                                                                                                       | 5.46e+02 (a.u.min <sup>-1</sup> )    |
| $v_{maxComW}$        | Maximal synthesis rate of ComW                                                                                                       | 3.07e+03 (a.u.min <sup>-1</sup> )    |
| $v_{maxDprA}$        | Maximal synthesis rate of DprA                                                                                                       | 2.62e+01 (a.u.min <sup>-1</sup> )    |
| $v_{maxSsbB}$        | Maximal synthesis rate of SsbB                                                                                                       | 2.30e+02 (a.u.min <sup>-1</sup> )    |
| $v_{maxComZ}$        | Maximal synthesis rate of ComZ                                                                                                       | 4.48e+03 (a.u.min <sup>-1</sup> )    |
| $v_{maxact}$         | Maximal CSP-induced auto-phosphorylation rate of (ComD) <sub>D</sub>                                                                 | 10 (a.u.min <sup>-1</sup> )          |
| $K_{iComE}$          | Dissociation constant for the interaction ComE- $P_{comC}$                                                                           | 0.437349 (a.u.)                      |
| $K_{ComE\sim P}$     | Required concentration of ComE~P for half-maximum synthesis rate of ComC, ComD and ComE in absence of competitive inhibition by ComE | 0.154554 (a.u.)                      |
| $K_{iComE\_AB}$      | Dissociation constant for the interaction ComE- $P_{comAB}$                                                                          | 0.599997 (a.u.)                      |
| $K_{ComE\sim P\_AB}$ | Required concentration of ComE~P for half-maximum synthesis rate of ComAB in absence of competitive inhibition by ComE               | 0.11596 (a.u.)                       |
| $K_{ComX}$           | Required concentration of ComE~P for half-maximum synthesis rate of ComX under its inactive form                                     | 4.48531 (a.u.)                       |
| $K_{ComW}$           | Required concentration of ComE~P for half-maximum synthesis rate of ComW                                                             | 7.43985 (a.u.)                       |
| $K_{DprA}$           | Required concentration of ComX <sub>act</sub> for half-maximum synthesis rate of DprA                                                | 5.75922 (a.u.)                       |
| $K_{SsbB}$           | Required concentration of ComX <sub>act</sub> for half-maximum synthesis rate of SsbB                                                | 1.08504 (a.u.)                       |
| $K_{ComZ}$           | Required concentration of ComX <sub>act</sub> for half-maximum synthesis rate of ComZ                                                | 0.19036 (a.u.)                       |
| $K_{act}$            | Required concentration of CSP for half- maximum CSP-induced auto-phosphorylation rate of (ComD) <sub>D</sub>                         | 4.42425 (a.u.)                       |
| $k_{on\_D}$          | ComD homodimer association rate constant                                                                                             | 0.00191809 (a.u.)                    |
| $k_{off\_D}$         | ComD homodimer dissociation rate constant                                                                                            | 0.00165586 (a.u.)                    |
| $k_{on\_DprA\_EP}$   | Binding rate constant between ComE~P and DprA                                                                                        | 0.999995                             |
| $\epsilon$           | pre-CSP (ComC) export rate                                                                                                           | 0.000399909 (a.u.min <sup>-1</sup> ) |
| $\lambda$            | Transphosphorylation rate constant                                                                                                   | 1 (min <sup>-1</sup> )               |
| $\rho$               | Spontaneous dephosphorylation rate of ComE~P                                                                                         | 0.310407 (min <sup>-1</sup> )        |
| $\omega_1$           | Binding rate constant between ComX <sub>ina</sub> and ComW                                                                           | 8.9263 (a.u.)                        |
| $\omega_2$           | Binding rate constant between ComW <sub>act</sub> and ComZ                                                                           | 2.42e+02 (a.u.)                      |
| $e$                  | Hill coefficient                                                                                                                     | 2.9127 (a.u.)                        |
| $x$                  | Hill coefficient                                                                                                                     | 1.28427 (a.u.)                       |
| $d$                  | Hill coefficient                                                                                                                     | 1 (a.u.)                             |
| $s$                  | Hill coefficient                                                                                                                     | 1.77409 (a.u.)                       |
| $w$                  | Hill coefficient                                                                                                                     | 1.27205 (a.u.)                       |
| $z$                  | Hill coefficient                                                                                                                     | 3.99964 (a.u.)                       |
| $\gamma_{preCSP}$    | Degradation rate constant of pre-CSP                                                                                                 | 0.00833326 (min <sup>-1</sup> )      |
| $\gamma_{CSP}$       | Degradation rate constant of CSP                                                                                                     | 0.08 (min <sup>-1</sup> )            |
| $\gamma_{ComAB}$     | Degradation rate constant of ComAB                                                                                                   | 0.00806448 (min <sup>-1</sup> )      |
| $\gamma_{ComD}$      | Degradation rate constant of ComD and (ComD <sub>consumed</sub> ) <sub>D</sub>                                                       | 0.00833333 (min <sup>-1</sup> )      |
| $\gamma_{ComE}$      | Degradation rate constant of ComE                                                                                                    | 0.00833318 (min <sup>-1</sup> )      |
| $\gamma_{ComX}$      | Degradation rate constant of ComX <sub>ina</sub> and ComX <sub>act</sub>                                                             | 0.0859111 (min <sup>-1</sup> )       |
| $\gamma_{ComW}$      | Degradation rate constant of ComW <sub>ina</sub> and ComW <sub>act</sub>                                                             | 0.0859111 (min <sup>-1</sup> )       |
| $\gamma_{DprA}$      | Degradation rate constant of DprA                                                                                                    | 0.00833343 (min <sup>-1</sup> )      |
| $\gamma_{SsbB}$      | Degradation rate constant of SsbB                                                                                                    | 0.113757 (min <sup>-1</sup> )        |
| $\gamma_{ComZ}$      | Degradation rate constant of ComZ                                                                                                    | 0.00833335 (min <sup>-1</sup> )      |

<sup>&</sup>a.u. = arbitrary units
